# Supplementary material
Source: publisher site journal article supplement (https://www.spandidos-publications.com/5341/downloadSupplementary)
Supplement: Supplementary file 1 [file downloadSupplementary]

## Sheet: scores
Table SII. Complete table of docking scores to sodium voltage-gated channel alpha subunit 8.
ID	Grid_Score	Grid_vdw_energy	Grid_es_energy	Internal_energy_repulsive	Name
T2096	-122.596	-67.5617	-55.0345	14.1862	Neomycin Sulphate B
T1104	-122.172	-69.007	-53.1654	19.9233	Paromomycin Sulfate
T0950	-122.117	-70.7967	-51.3203	15.3193	Neomycin sulfate
T1776	-121.521	-71.2886	-50.2322	4.5184	#N/A
T1776L	-120.121	-69.3475	-50.7733	4.7753	Plerixafor 8HCl (AMD3100 8HCl)
T3934	-112.73	-102.798	-9.9318	31.7494	Isavuconazonium sulfate
T1013	-111.823	-68.5774	-43.2455	12.3296	Amikacin
T4509	-111.5	-110.406	-1.0934	24.5032	Inositol nicotinate
T2119	-111.422	-106.462	-4.9605	22.766	ABT199
T1670	-110.727	-107.231	-3.4951	54.6025	Lanatoside C
T1716	-110.549	-105.321	-5.2285	19.6045	Echinacoside
T5024	-110.513	-101.599	-8.9136	26.1257	Cefotiam Hexetil Hydrochloride
T0772	-109.132	-103.34	-5.7918	17.7748	Troxerutin
T0777	-109.072	-95.5278	-13.5439	39.1602	Tilmicosin
T2813	-108.935	-104.627	-4.3084	44.0755	Madecassoside
T3125	-106.868	-66.1974	-40.6705	19.3377	Amikacin Sulfate Salt
T4544	-106.36	-104.831	-1.5292	36.2044	Elbasvir
T7213	-105.051	-93.3544	-11.6968	28.637	Demecarium bromide
T1326	-104.957	-64.7064	-40.251	13.1269	Gentamycin sulfate
T3025	-104.393	-100.281	-4.1125	51.3199	Asiaticoside
T0819	-104.353	-85.8581	-18.4948	41.0851	Spiramycin
T5133	-104.203	-99.3909	-4.812	21.4745	Dabigatran Etexilate Mesylate
T5863	-104.142	-90.0631	-14.0787	16.9304	Indinavir sulfate
T7943	-103.747	-93.5613	-10.1859	15.3335	Fluphenazine decanoate
T1441	-103.68	-84.4551	-19.2243	33.9904	Capastat sulfate
T7903	-103.593	-97.2329	-6.3604	22.0103	Saquinavir
T1084	-103.284	-66.5227	-36.7617	13.3575	Apramycin sulfate
T6200	-102.59	-102.283	-0.3067	36.3816	#N/A
T0193	-102.301	-86.9261	-15.3753	26.687	Manidipine dihydrochloride
T8118	-102.136	-60.4642	-41.6721	9.3789	Bekanamycin
T1678	-101.934	-96.2931	-5.6414	39.1606	#N/A
T8156	-101.892	-95.2621	-6.6299	42.7354	#N/A
T1036	-101.835	-57.0826	-44.7523	16.3001	Netilmicin sulfate
T1219	-101.319	-53.4004	-47.9188	7.2968	Sisomicin Sulfate
T0389	-100.753	-99.288	-1.4653	26.8242	Dabigatran etexilate
T2961	-100.121	-94.9822	-5.1393	40.0986	Notoginsenoside R1
T0861	-100.004	-87.6995	-12.304	48.4756	Tylosin tartrate
T1623	-99.9847	-99.7122	-0.2726	22.7244	Lopinavir
T7056	-99.8342	-90.9477	-8.8865	11.4759	Dronedarone
T3334	-99.676	-97.8723	-1.8037	26.5245	Velpatasvir
T6549	-99.453	-62.2904	-37.1626	19.0137	Isepamicin sulfate
T1000L	-99.2428	-70.6176	-28.6252	12.6129	Chlorhexidine Acetate
T1255	-99.2126	-57.2063	-42.0063	16.1966	Tobramycin
T0971	-98.9616	-84.5007	-14.4609	79.0198	Dirithromycin
T1147	-98.505	-72.4067	-26.0983	8.456	Chlorhexidine hydrochloride
T4203	-98.4857	-97.1356	-1.3501	29.5319	Ledipasvir acetone
T2911	-98.4666	-92.7414	-5.7253	33.0612	Stevioside
T7766	-98.3918	-88.3119	-10.0799	21.7365	Remdesivir
T7392	-98.3362	-79.6672	-18.669	14.8718	Revefenacin
T6577	-98.322	-80.1512	-18.1707	20.2707	Manidipine
T0247	-98.2469	-83.5502	-14.6967	34.8424	Acarbose
T0793	-98.2095	-61.9226	-36.2869	10.5371	Kanamycin sulfate
T1073	-98.1744	-89.4754	-8.699	10.6265	Dronedarone hydrochloride
T1557	-97.8213	-84.4692	-13.3521	47.5414	#N/A
T6211	-97.4755	-96.5627	-0.9128	19.7644	Posaconazole
T2872	-97.4718	-93.1964	-4.2754	55.0239	Ginsenoside Re
T2519	-97.3379	-88.9957	-8.3421	24.3238	Lercanidipine
T1011	-97.2471	-96.4233	-0.8238	18.1921	Itraconazole
T6874	-97.0093	-86.5426	-10.4667	25.4516	Lercanidipine hydrochloride
T1520	-96.3138	-85.7944	-10.5193	23.5491	Aliskiren hemifumarate
T1000	-96.2271	-69.506	-26.7211	10.7813	Chlorhexidine
T6019	-95.9554	-81.1153	-14.8401	30.0622	Volasertib
T5067	-95.8474	-101.374	5.5262	20.5154	Flavin Adenine Dinucleotide Disodium
T5001	-95.2942	-78.8254	-16.4688	17.7386	Nintedanib Ethanesulfonate Salt
T2211	-95.2488	-62.6322	-32.6166	13.9111	#N/A
T3621	-95.2365	-78.889	-16.3475	30.1559	#N/A
T6235	-95.236	-83.8189	-11.4171	9.3833	Lapatinib Ditosylate
T2727	-94.943	-98.7286	3.7855	16.9464	Salvianolic acid B
T7779	-94.9286	-83.5554	-11.3732	14.2451	Nelfinavir
T1609	-94.916	-88.5121	-6.4039	8.9452	NAD+
T0060	-94.7552	-77.8738	-16.8814	16.077	Streptomycin sulfate
T4168	-94.7528	-89.1965	-5.5563	19.9147	Visomitin
T0158	-94.7292	-72.6011	-22.1281	33.6858	Mitoxantrone hydrochloride
T6512	-94.6383	-62.1394	-32.4988	15.8678	Geneticin sulfate
T3054	-94.5354	-78.2685	-16.2669	9.1682	Daurisoline
T4409	-94.3427	-78.5681	-15.7747	19.9005	Gilteritinib
T6229	-94.2369	-94.9598	0.7229	35.2454	Daclatasvir
T1777	-94.1748	-77.3995	-16.7753	18.374	Nintedanib
T6230	-93.757	-77.8768	-15.8802	6.5909	Imatinib
T0078	-93.6843	-85.1329	-8.5514	6.632	Lapatinib
T0078L	-93.3731	-84.0099	-9.3632	4.8544	Lapatinib ditosylate monohydrate
T0878	-93.3655	-90.4886	-2.8769	14.967	Diosmin
T7604	-93.3009	-92.8535	-0.4474	41.769	Valrubicin
T8183	-93.2953	-87.1586	-6.1367	33.8315	Deslanoside
T6813	-93.0915	-82.7077	-10.3838	22.882	Cyclo(RGDyK)
T7423	-92.9753	-94.1514	1.1761	15.9123	Diquafosol tetrasodium
T1995	-92.9371	-90.7657	-2.1714	14.0931	Fedratinib
T7148	-92.8744	-85.8487	-7.0257	42.5874	JOSAMYCIN
T1621	-92.8589	-75.9234	-16.9355	10.9427	Imatinib Mesylate
T0121	-92.4427	-79.5691	-12.8736	33.0817	Azelnidipine
T2767	-92.2305	-88.8863	-3.3442	14.004	Neohesperidin Dihydrochalcone
T2325	-92.0828	-80.3023	-11.7806	19.788	Neratinib
T0474	-92.0535	-86.9672	-5.0863	68.6004	#N/A
T5725	-91.9287	-94.9328	3.004	14.986	#N/A
T0966	-91.918	-94.7429	2.8249	34.4327	Sennoside A
T5028	-91.7105	-77.5625	-14.1479	13.6065	Landiolol hydrochloride
T1035	-91.3042	-89.3314	-1.9728	19.8763	Hesperidin
T5037	-91.2367	-81.3075	-9.9292	54.8109	Midecamycin
T1151	-91.193	-80.9083	-10.2847	53.0504	Roxithromycin
T1214	-91.0903	-61.0599	-30.0304	10.7089	Ribostamycin sulfate
T0228	-91.0152	-85.3406	-5.6746	17.0403	#N/A
T2713	-91.0087	-88.8003	-2.2084	18.8565	D-Stachyose tetrahydrate
T2609	-90.9147	-75.289	-15.6257	6.2333	Masitinib
T6190	-90.7714	-90.5415	-0.2299	36.8235	Telaprevir
T1474	-90.7498	-83.8643	-6.8855	13.705	Otilonium bromide
T1786	-90.6862	-90.4916	-0.1946	35.2503	Daclatasvir dihydrochloride
T2543	-90.575	-88.9585	-1.6166	53.9907	Cabazitaxel
T1677L	-90.4895	-90.1081	-0.3814	18.8898	Montelukast sodium
T7417	-90.4087	-84.989	-5.4198	14.9021	Avatrombopag
T4474	-90.3162	-91.1489	0.8326	42.7491	Asunaprevir
T7387	-90.13	-86.9981	-3.1319	17.4297	Ceftaroline fosamil
T6588	-90.0201	-72.2282	-17.7919	19.2621	Mitoxantrone
T6001	-89.9027	-85.3381	-4.5646	11.2515	Nelfinavir Mesylate
T6322	-89.8571	-73.7451	-16.112	11.8614	#N/A
T2761	-89.2286	-84.8961	-4.3324	11.2341	Naringin dihydrochalcone
T0152	-89.2092	-75.3134	-13.8958	12.8366	Bosutinib
T2400	-89.1759	-90.8006	1.6247	20.2053	Candesartan Cilexetil
T1405	-89.1569	-86.613	-2.5439	12.2082	Cefditoren pivoxil
T0186	-89.0616	-91.0404	1.9788	69.5886	Docetaxel trihydrate
T2217	-89.0534	-88.139	-0.9144	45.1079	Cephalomannine
T7744	-88.9277	-63.3035	-25.6243	32.8783	Piperaquine tetraphosphate tetrahydrate
T6267	-88.9114	-82.2312	-6.6802	17.7548	Lomitapide
T3265	-88.8246	-75.907	-12.9176	57.5455	Azathramycin
T0791	-88.7245	-85.2479	-3.4766	13.4747	Reserpine
T2323	-88.6337	-86.6934	-1.9403	20.6371	Efonidipine
T2372	-88.5735	-74.5523	-14.0211	8.2624	Ponatinib
T3629	-88.3443	-75.3279	-13.0163	57.5122	Gamithromycin
T6437	-88.3141	-88.6065	0.2923	21.21	Cefoperazone
T1677	-88.3106	-91.6144	3.3038	25.0937	#N/A
T2066	-88.0723	-81.24	-6.8323	5.8265	Quizartinib
T2768	-88.044	-82.4458	-5.5982	24.7263	Saikosaponin A
T6334	-88.036	-87.7034	-0.3326	45.2394	Ridaforolimus
T2737	-87.9996	-85.1498	-2.8498	16.325	Neohesperidin
T5036	-87.8738	-90.8603	2.9865	9.3484	cangrelor tetrasodium
T1788	-87.8592	-81.3231	-6.5361	15.6251	EPZ6438
T3630	-87.7071	-85.7298	-1.9773	17.8334	Relugolix
T3402	-87.6677	-82.756	-4.9117	28.9152	Ginsenoside Rg3
T8270	-87.5945	-85.2822	-2.3124	12.8238	Deserpidine
T5031	-87.4762	-85.0892	-2.387	30.119	Elagolix sodium
T5126	-87.2914	-90.552	3.2606	22.9383	Glecaprevir
T6044	-87.2839	-82.1047	-5.1792	15.3568	Telotristat Etiprate
T2777	-87.1659	-83.507	-3.6589	47.9729	Ginsenoside Rg1
T5134	-87.1461	-76.669	-10.4771	13.6318	Vilanterol trifenatate
T2146	-87.1201	-85.0691	-2.051	12.0532	Fulvestrant
T11897	-87.0454	-76.8394	-10.206	14.0615	Telotristat ethyl
T2891	-86.9678	-84.9934	-1.9744	19.1267	Monoammonium glycyrrhizinate
T1218	-86.7295	-88.7783	2.0488	26.7804	#N/A
T3607	-86.6639	-78.2691	-8.3949	43.0734	#N/A
T17199	-86.5025	-83.2165	-3.286	12.1902	Udenafil
T1419	-86.4442	-71.3865	-15.0577	48.6365	Azithromycin dihydrate
T8148	-86.2765	-80.9001	-5.3764	14.994	Mupirocin calcium
T1022	-86.2606	-67.6252	-18.6353	29.3448	Hygromycin B
T1470L	-86.2306	-72.4567	-13.7738	29.0624	Fexofenadine hydrochloride
TMS0418	-86.1385	-82.0477	-4.0907	50.5036	#N/A
T2490	-86.1313	-81.7716	-4.3597	11.7219	Osimertinib
T1791	-86.0837	-76.9435	-9.1402	17.339	LDK378
T3678	-85.9899	-84.0776	-1.9122	7.8453	Entrectinib
T2335	-85.9644	-77.5988	-8.3655	16.2106	Ebastine
T3139	-85.8763	-85.1511	-0.7251	14.9453	Sultamicillin Tosylate
T0979	-85.8201	-74.4517	-11.3684	20.9179	Dequalinium chloride
T2734	-85.7919	-86.2397	0.4477	42.8082	Sennoside B
T8222	-85.7909	-80.3254	-5.4655	8.2169	Selpercatinib
T3762	-85.7105	-89.4709	3.7605	29.0741	Hyaluronic acid
T0968	-85.6905	-85.2327	-0.4578	80.8837	Paclitaxel
T1629	-85.5768	-77.202	-8.3748	87.892	Rifapentine
T3380	-85.4921	-78.0941	-7.398	13.898	Homoharringtonine
T0795	-85.4536	-81.6324	-3.8212	13.2653	Rutin
T5836	-85.3861	-83.5277	-1.8584	28.7567	Eprinomectin
T6917	-85.1922	-81.2546	-3.9375	13.8217	Oleuropein
T2509	-85.1265	-79.0026	-6.1239	7.0166	Tozasertib
T3913	-85.0921	-81.8715	-3.2206	31.1778	Saikosaponin D
T3634	-85.091	-78.5195	-6.5715	10.957	Osimertinib mesylate
T6628	-85.0778	-79.1711	-5.9066	44.1303	Pirarubicin
T2535	-84.9889	-78.0764	-6.9125	9.6247	Ivabradine hydrochloride
T1504	-84.8914	-78.5877	-6.3037	11.6269	Silodosin
T1616	-84.7818	-79.9142	-4.8676	12.1265	Cefotiam hydrochloride
T0207	-84.68	-71.9147	-12.7653	9.0271	Ranolazine dihydrochloride
T6016	-84.6022	-78.4925	-6.1096	23.2135	Maraviroc
T0969	-84.3443	-83.4418	-0.9025	31.1982	Doramectin
T6633	-84.2823	-71.0685	-13.2138	6.4855	Ranolazine
T6264	-84.1726	-82.7654	-1.4072	17.9776	Bosentan
T6492	-84.122	-78.957	-5.165	32.1343	#N/A
T3111	-83.8693	-68.1726	-15.6967	14.8903	LY2835219
T0295	-83.8048	-85.516	1.7112	73.9541	Digitoxin
T3523	-83.796	-82.9395	-0.8565	34.4503	Fostemsavir
T3275	-83.6736	-72.7097	-10.9639	8.5243	Nefazodone hydrochloride
T1448	-83.624	-74.9569	-8.6672	4.4617	Dasatinib
T4990	-83.6161	-80.3492	-3.2669	15.2078	Cefcapene Pivoxil Hydrochloride
T6715	-83.5558	-75.6497	-7.9061	15.7369	Valnemulin HCl
T8401	-83.5053	-83.7242	0.219	23.0465	Efonidipine hydrochloride monoethanolate
T1448L	-83.4578	-76.3591	-7.0987	5.1249	Dasatinib monohydrate
T6401	-83.0207	-68.8579	-14.1628	78.164	Azithromycin
T6653	-83.0085	-76.3528	-6.6557	11.0216	Salmeterol Xinafoate
T6736	-82.9976	-83.5008	0.5032	28.2343	Zafirlukast
T1131	-82.9671	-81.5265	-1.4407	41.5044	#N/A
T2973	-82.86	-76.9087	-5.9513	41.4555	Astragaloside IV
T1489	-82.5676	-84.7817	2.2141	23.5207	Fosinopril sodium
T2381	-82.5245	-63.9756	-18.5489	18.5899	Abemaciclib
T1034	-82.4652	-80.9551	-1.5101	55.8797	Docetaxel
T0313	-82.4403	-92.5986	10.1583	94.7574	Evans blue
T1465	-82.4005	-80.114	-2.2865	13.831	Mupirocin
TQ0277	-82.2638	-82.0938	-0.17	15.2781	Pralsetinib
T19862	-82.2574	-83.2413	0.9839	32.8358	Voxilaprevir
T1053	-82.0811	-69.5431	-12.538	12.2866	Mebeverine hydrochloride
T2219	-82.0791	-69.5817	-12.4974	8.0163	Puromycin dihydrochloride
T2492	-82.0742	-79.0426	-3.0315	13.9298	Perifosine
T1266	-81.9828	-72.4704	-9.5123	20.7817	Terfenadine
T0179	-81.9753	-78.4735	-3.5017	13.8804	Ticagrelor
T3606	-81.9603	-82.1505	0.1902	27.5171	#N/A
T1067	-81.9177	-75.0478	-6.87	41.2327	Amphotericin B
T1032	-81.8603	-71.8707	-9.9897	62.4257	Erythromycin
T1554	-81.837	-74.1504	-7.6866	26.2613	#N/A
T0138	-81.7943	-83.6482	1.8538	14.0576	Cefpiramide acid
T1518	-81.7892	-83.5059	1.7167	18.4564	Olmesartan Medoxomil
T1470	-81.6529	-79.4559	-2.197	24.8721	#N/A
T2806	-81.6239	-71.2999	-10.3239	49.1686	Lappaconitine
T2324	-81.4486	-79.7751	-1.6734	23.1176	Darunavir
T2494	-81.413	-79.4119	-2.0011	21.4527	Cilengitide
T5842	-81.2688	-71.4998	-9.769	17.5884	Bromocriptine mesylate
T6595	-81.1715	-75.9742	-5.1973	22.8893	Moexipril HCl
T0156	-81.1	-69.6266	-11.4734	19.0253	Rocuronium bromide
T0595	-81.0781	-78.0989	-2.9791	16.41	Naringin
T6219	-81.0496	-80.0238	-1.0258	21.0997	Azilsartan Medoxomil
T1537	-81.0487	-79.0963	-1.9524	32.5894	Rapamycin
T6025	-81.0377	-77.763	-3.2747	32.3147	Danoprevir
T2586	-80.9694	-81.4733	0.5039	11.6531	Cabozantinib
T2409L	-80.918	-80.9329	0.0149	14.8665	Tenofovir Disoproxil Fumarate
T6403	-80.9023	-72.508	-8.3943	20.671	Siponimod
T2605	-80.8788	-80.2357	-0.6431	12.9176	R788 Disodium
T6280	-80.8615	-73.68	-7.1816	10.2789	Enzastaurin
T7346	-80.8142	-70.7592	-10.055	8.7479	#N/A
T0974	-80.7906	-76.6643	-4.1263	20.5241	Novobiocin Sodium
T5164	-80.7768	-80.0941	-0.6828	11.3654	Cabozantinib hydrochloride (849217-68-1(free base))
T1797	-80.6862	-80.0566	-0.6296	8.0813	Cabozantinib Malate
T6115	-80.6774	-80.8617	0.1843	13.027	Fostamatinib
T6560	-80.665	-74.1281	-6.5369	25.3406	Lappaconite HBr
T4686	-80.6602	-82.8174	2.1572	18.4973	Simeprevir
T6487	-80.656	-80.2997	-0.3563	7.9875	Encorafenib
T0328	-80.6117	-56.3194	-24.2923	9.6434	#N/A
T3226	-80.5675	-82.6532	2.0856	19.1437	Paritaprevir
T7225	-80.5537	-76.1349	-4.4189	46.9081	AnaMorelin hydrochloride
T4988	-80.2864	-80.834	0.5476	31.5704	Boceprevir
T3335	-80.2821	-79.7301	-0.5521	19.7981	Darunavir?Ethanolate
T4202	-80.2725	-76.8952	-3.3773	7.8651	Delamanid
T2555	-80.226	-73.3927	-6.8333	7.2023	Aclidinium bromide
T2369	-80.1389	-79.1636	-0.9752	12.6562	Rociletinib
T1523	-80.1232	-80.025	-0.0981	12.0451	Teniposide
T1675	-80.0286	-79.7603	-0.2683	12.1645	Adefovir dipivoxil
T1318	-79.9639	-78.5815	-1.3824	30.4203	Ouabain octahydrate
T2213	-79.9529	-71.9118	-8.0411	12.2506	Terconazole
T6228	-79.9	-72.3031	-7.5969	16.8111	Irinotecan
T2920	-79.8782	-62.534	-17.3443	14.5612	Berbamine dihydrochloride
T1496	-79.7885	-71.2064	-8.5821	15.0496	Amiodarone hydrochloride
T3977	-79.7704	-78.0257	-1.7447	25.1387	Lifitegrast
T1522	-79.7511	-75.0867	-4.6644	21.4561	Iopromide
T2368L	-79.7205	-72.5519	-7.1686	12.8526	Edoxaban
T0681	-79.6754	-69.3836	-10.2918	62.0531	Rifampicin
T1784	-79.6351	-79.8979	0.2628	35.8365	Everolimus
T2712	-79.3735	-65.7418	-13.6317	4.0329	#N/A
T4610	-79.301	-72.6411	-6.66	16.5465	BMS927711
T8690	-79.2933	-74.9038	-4.3895	6.9811	Brexpiprazole HCl
T6918	-79.2009	-71.9524	-7.2485	7.0182	Olmutinib
T5022	-79.1619	-74.9327	-4.2291	12.9185	Ceforanide
T1215	-79.1538	-68.6139	-10.5399	12.1578	Nicardipine hydrochloride
T0166	-79.1445	-65.9673	-13.1772	21.6389	Pancuronium bromide
T5841	-79.1428	-74.985	-4.1578	22.6341	Travoprost
T1594	-78.9393	-65.7958	-13.1436	28.7906	Vecuronium bromide
T0522	-78.868	-83.3794	4.5113	15.5319	Diammonium Glycyrrhizinate
T1291	-78.8041	-66.5078	-12.2963	9.4582	Cisapride
T1033	-78.7727	-76.786	-1.9866	49.054	Monensin sodium salt
T1790	-78.6244	-77.9197	-0.7046	15.8374	Fosaprepitant dimeglumine
T1549	-78.6104	-70.1718	-8.4387	6.065	Raloxifene hydrochloride
T0244	-78.5436	-70.7081	-7.8355	8.5313	Tilorone dihydrochloride
T0089	-78.5097	-62.8632	-15.6465	10.6782	Cetirizine dihydrochloride
T4547	-78.4954	-80.0518	1.5564	29.6924	Grazoprevir
T3122	-78.4947	-62.7178	-15.7769	9.7326	(+)-Fangchinoline
T6295	-78.4885	-75.5058	-2.9827	15.9577	#N/A
T1020	-78.4717	-60.8168	-17.6548	30.1015	Doxorubicin hydrochloride
T3S1858	-78.4083	-77.4881	-0.9202	23.1231	Lutein
T6232	-78.4021	-75.0131	-3.389	5.9666	Vilazodone HCl
T7111	-78.3512	-79.2031	0.8519	14.2238	Tenofovir Disoproxil
T2147	-78.2635	-77.3021	-0.9614	5.7928	Nilotinib (monohydrochloride monohydrate)
T2741	-78.247	-86.4039	8.1569	13.4291	Glycyrrhizin
T3626	-78.2332	-73.9424	-4.2909	14.3775	Acalabrutinib
T3112	-78.2035	-80.0518	1.8484	17.189	Verteporfin
T2996	-78.1974	-68.0936	-10.1038	15.7859	Tetrandrine
T2537	-78.167	-72.4897	-5.6774	14.3056	Tirofiban hydrochloride monohydrate
T1743	-78.1591	-64.4005	-13.7586	11.2862	Aprepitant
T1279	-78.1531	-74.7639	-3.3891	5.5087	Vilazodone
T4998	-78.1245	-77.0744	-1.0501	19.9879	#N/A
T1434	-78.0523	-68.9146	-9.1377	61.7744	Clarithromycin
T1010	-78.034	-71.5335	-6.5006	36.4752	Verapamil hydrochloride
T2854	-77.9958	-74.2572	-3.7385	22.6961	Forsythin
T0679	-77.9562	-77.8417	-0.1145	16.9547	Ketoconazole
T1075	-77.9501	-77.7281	-0.222	17.2602	Vitamin K1
T1154	-77.8633	-74.777	-3.0863	27.6761	Rifaximin
T0706	-77.8342	-63.1589	-14.6753	10.2622	Lisinopril dihydrate
T0486	-77.7672	-66.4607	-11.3064	14.381	Irinotecan hydrochloride trihydrate
T6213	-77.7379	-76.9664	-0.7715	45.8754	Vinorelbine Tartrate
T6018	-77.7316	-69.1945	-8.5372	57.4659	Zosuquidar 3HCl
T8405	-77.7269	-68.6909	-9.036	13.0478	Vardenafil hydrochloride
T2561	-77.7149	-77.8755	0.1605	8.002	Macitentan
T1735	-77.706	-74.5668	-3.1392	17.2077	Lurasidone hydrochloride
T8065	-77.6943	-70.6825	-7.0117	11.8721	Tiamulin
T2544	-77.6688	-69.7772	-7.8916	11.5981	Bazedoxifene acetate
T6638	-77.6419	-71.4021	-6.2398	39.3789	Retapamulin
T5293	-77.6355	-73.205	-4.4305	9.7706	Maltotriose
T0189L	-77.6082	-68.6652	-8.9429	10.6442	Pemetrexed disodium
T3368	-77.5875	-75.7567	-1.8307	26.3414	Alpha-Hederin
T3266	-77.5371	-70.4166	-7.1205	17.0709	Lumefantrine
T3283	-77.4134	-76.6825	-0.7309	8.4242	#N/A
T1668	-77.3914	-77.4698	0.0784	65.6956	Vinblastine sulfate
T0044	-77.3883	-68.2502	-9.1382	37.4859	Oxethazaine
T4250	-77.2641	-69.6111	-7.6529	17.4775	Bilastine
T8126	-77.2079	-80.8329	3.625	13.3651	Cefodizime Sodium
T0371	-77.2069	-80.4348	3.2279	11.8744	Gliquidone
T2306	-77.1448	-68.5191	-8.6256	9.9281	Brexpiprazole
T3617	-77.1441	-76.7193	-0.4248	19.3454	Ivosidenib
T1469	-77.0857	-63.3754	-13.7103	8.7426	Levocetirizine
T3216	-77.073	-73.8737	-3.1993	11.3843	Selexipag
T2303	-77.0675	-72.1589	-4.9086	7.0504	Afatinib
T6676	-77.0222	-74.9369	-2.0853	11.861	Sofosbuvir
T6227	-76.9922	-71.4211	-5.5711	16.2023	Benidipine hydrochloride
T0081	-76.9408	-68.3455	-8.5953	6.8171	Lafutidine
T6226	-76.9072	-69.2997	-7.6075	7.8861	Pemetrexed Disodium Hydrate
T7603	-76.8981	-73.207	-3.6911	15.5162	Pinaverium bromide
T2409	-76.8718	-77.148	0.2762	9.9575	Tenofovir alafenamide
T0388	-76.7361	-75.1301	-1.606	13.4333	Cilnidipine
T6476	-76.7352	-66.6636	-10.0717	12.9075	Dofetilide
T0956	-76.696	-72.7154	-3.9806	33.2399	Abamectin
T2368	-76.6698	-75.8075	-0.8623	12.1585	Edoxaban Tosylate Monohydrate
T1566	-76.5497	-67.4394	-9.1103	8.6054	Aripiprazole
T1773	-76.5349	-72.9248	-3.6101	6.8629	Afatinib Dimaleate
T0210	-76.4795	-66.6798	-9.7996	16.8765	Tamsulosin hydrochloride
T7282	-76.4697	-75.3159	-1.1538	13.2061	Tenofovir alafenamide fumarate
T3034	-76.4278	-60.6563	-15.7715	9.5705	Eprazinone dihydrochloride
T1671	-76.4121	-63.8737	-12.5384	6.6326	Mirabegron
T3116	-76.353	-77.7298	1.3768	17.5027	Atorvastatin Calcium
T6035	-76.2448	-70.0479	-6.1969	11.5429	Odanacatib
T0191	-76.2309	-68.3728	-7.8581	7.3589	Linagliptin
T2483	-76.2143	-74.647	-1.5673	4.2331	Dacomitinib
T6293	-76.144	-68.7902	-7.3538	14.9684	Mycophenolate Mofetil
T21312	-76.1314	-66.1089	-10.0224	8.2859	Afatinib free base
T4749	-76.1105	-76.0317	-0.0788	20.1974	Squalene
T2500	-76.0568	-70.6684	-5.3884	12.8363	Cediranib
T4097	-76.0401	-69.0426	-6.9976	7.9505	Vardenafil hydrochloride trihydrate
T6978	-76.0393	-67.06	-8.9793	11.6113	Almitrine dimesylate
T0033	-75.9933	-72.9515	-3.0417	11.8972	Miltefosine
T1618	-75.9888	-73.9624	-2.0264	10.8406	Dypyridamole
T2328	-75.8903	-76.18	0.2897	7.0164	Radotinib
T5666	-75.8849	-77.8278	1.9429	11.7786	Dipotassium glycyrrhizinate
T1016	-75.8776	-75.2076	-0.67	18.6909	Vitamin E Acetate
T2200	-75.8698	-56.9109	-18.9589	11.137	Hydroxyzine dihydrochloride
T0189	-75.8066	-63.6727	-12.1339	7.7795	Pemetrexed acid
T1105	-75.8016	-72.1932	-3.6084	15.6482	Penfluridol
T0155	-75.7771	-71.6851	-4.0921	18.1606	#N/A
T2538	-75.7575	-71.1878	-4.5697	9.9065	Bimatoprost
T3716	-75.6851	-66.3601	-9.325	15.1847	#N/A
T0467	-75.6574	-65.8726	-9.7848	10.6791	Sildenafil citrate
T0125	-75.6338	-69.1689	-6.465	26.9577	Epirubicin hydrochloride
T3093	-75.6123	-37.4914	-38.1209	4.1977	Spermine?Tetrahydrochloride
T2319	-75.5575	-67.8094	-7.7481	15.5658	Acotiamide hydrochloride
T7120	-75.452	-73.3135	-2.1385	10.9071	Cefetamet pivoxil hydrochloride
T2263	-75.4217	-73.6526	-1.7691	20.3969	VX661
T7106	-75.3498	-75.2734	-0.0764	16.6877	Menaquinone-4
T1524	-75.3406	-75.2687	-0.0719	7.1675	Nilotinib
T3263	-75.3181	-70.5007	-4.8174	12.6331	Cefminox Sodium
T0127	-75.2556	-77.0982	1.8426	12.0887	Glimepiride
T1634	-75.2513	-76.8742	1.623	10.1458	Glyburide
T0982	-75.2291	-55.3805	-19.8487	17.7087	(+)-Emetine dihydrochloride hydrate
T5856	-75.198	-70.1811	-5.017	10.3379	Barnidipine hydrochloride
T2546	-75.1873	-71.4241	-3.7632	11.8626	Pimozide
T2334	-75.1721	-73.5154	-1.6566	10.752	Avanafil
T6983	-75.166	-64.4079	-10.758	8.564	Sildenafil Mesylate
T1539	-75.1654	-70.7963	-4.3691	11.1713	Iloperidone
T2528	-75.1392	-73.9909	-1.1483	19.7915	Latanoprost
T2336	-75.1389	-74.9276	-0.2113	20.7495	Menatetrenone
T3726	-75.1336	-69.2142	-5.9194	8.9424	Erdafitinib
T1569	-75.1311	-59.8337	-15.2974	29.624	Tigecycline
T2648	-75.123	-75.7273	0.6043	28.6855	Pimecrolimus
T7147	-75.0732	-58.6163	-16.4569	13.3742	Valbenazine
T6541	-75.0345	-65.1939	-9.8407	11.7549	Ibutilide Fumarate
T6302	-74.9293	-74.4238	-0.5055	31.3789	Lonafarnib
T5109	-74.8834	-66.9291	-7.9543	10.5877	Avapritinib
T1270	-74.6883	-73.9463	-0.7419	59.985	Vincristine sulfate
T8144	-74.6864	-69.5349	-5.1515	28.4774	#N/A
T0752	-74.6693	-72.6717	-1.9977	13.2046	L-Ascorbyl 6-palmitate
T6999	-74.6238	-60.4792	-14.1446	8.8379	Teneligliptin hydrobromide
T1633	-74.5997	-74.4516	-0.1481	69.4723	Beta-Carotene
T5189	-74.5109	-59.1843	-15.3266	26.28	Omadacycline
T5396	-74.5108	-73.0824	-1.4284	13.7813	Letermovir
T4978	-74.488	-70.4502	-4.0378	13.6269	Sarpogrelate hydrochloride
T0401	-74.411	-66.226	-8.185	19.434	Benzethonium chloride
T0918	-74.3894	-65.584	-8.8054	24.4979	Trimebutine
T3663	-74.2305	-66.2197	-8.0108	8.9185	Eliglustat
T0068	-74.2047	-59.5836	-14.621	7.2309	Fluphenazine hydrochloride
T0368	-74.1756	-68.6187	-5.5569	13.1407	Cinepazide maleate
T0271	-74.1516	-78.6579	4.5062	14.0061	Iodipamide
T6388	-74.1322	-73.8618	-0.2704	15.1382	Amprenavir
T7714	-74.1318	-69.2773	-4.8544	9.8212	Temocapil
T0346	-74.101	-54.9683	-19.1327	10.4093	#N/A
T5009	-74.0349	-67.7337	-6.3012	9.652	Trimethobenzamide hydrochloride
T2S1464	-73.9852	-72.7292	-1.256	13.7573	Thiocolchicoside
T2532	-73.8862	-73.7931	-0.093	29.2673	Tauroursodeoxycholic Acid
T6438	-73.8491	-70.0098	-3.8393	13.232	Cefoselis Sulfate
T2677	-73.7748	-61.5105	-12.2643	9.5595	Crenolanib
T1223	-73.6483	-76.3508	2.7025	9.0463	Ceftriaxone sodium
T4576	-73.6344	-69.3578	-4.2766	5.0099	Perospirone
T2346	-73.624	-65.8587	-7.7653	9.2282	Enasidenib
T1936	-73.6211	-67.627	-5.9941	23.8791	Alectinib
T6946	-73.603	-66.8642	-6.7388	17.4174	Pimavanserin tartrate
T2585	-73.5373	-66.3758	-7.1614	36.736	Bedaquiline
T1138	-73.535	-73.6967	0.1617	56.8354	Taurocholic acid sodium salt hydrate
T0694	-73.5238	-78.0404	4.5166	4.7346	Pranlukast
T1278	-73.5235	-65.9157	-7.6078	10.0807	Astemizole
T3S0807	-73.5187	-56.9655	-16.5533	15.8683	Berbamine
T0131	-73.389	-59.5139	-13.8751	7.9233	Cepharanthine
T6271	-73.2472	-59.5829	-13.6643	13.1527	#N/A
T0209	-73.2318	-65.1628	-8.069	39.5981	Loperamide hydrochloride
T0132	-73.1674	-71.7275	-1.4399	14.1675	Etoposide
T7217	-73.1632	-68.7436	-4.4196	8.5037	#N/A
T6571	-73.0888	-61.4687	-11.6201	21.2633	Lomerizine hydrochloride
T0942	-73.0332	-55.8691	-17.1641	11.9342	Quinacrine dihydrochloride
T1660	-73.0057	-71.6213	-1.3845	11.3505	Silibinin
T2144	-72.9963	-72.7691	-0.2272	30.4891	Tacrolimus
T3S0309	-72.975	-63.8993	-9.0757	24.8683	Raffinose
T6698	-72.8997	-67.3443	-5.5553	14.4423	Temocapril HCl
T6431	-72.8717	-72.4268	-0.4449	16.6133	Calcium Levofolinate
T2580	-72.8534	-58.4796	-14.3738	6.9592	Formoterol
T3098	-72.8473	-72.4473	-0.4	12.9054	Vorapaxar sulfate
T1228	-72.8309	-73.1521	0.3212	15.9027	Cefonicid sodium
T1570	-72.826	-74.0956	1.2696	13.8102	Telmisartan
T1534	-72.7691	-65.8118	-6.9574	25.1197	Darifenacin HBr
T4059	-72.7669	-71.6859	-1.081	18.1821	Selamectin
T6239	-72.757	-63.5047	-9.2523	19.9776	Palbociclib hydrochloride
T6241	-72.688	-56.3444	-16.3436	8.778	Quetiapine Fumarate
T8382	-72.6553	-68.4211	-4.2342	8.0852	Cariprazine HCl
T1511	-72.5545	-64.7326	-7.8219	33.8283	Daunorubicin hydrochloride
T8136	-72.5166	-68.632	-3.8846	4.6137	Perospirone hydrochloride
T4690	-72.4694	-64.1461	-8.3232	9.6754	Betrixaban hydrochloride(330942-05-7(free base))
T0865	-72.4524	-54.0073	-18.4452	15.3731	Ranitidine Hydrochloride
T2481	-72.4144	-70.2905	-2.1239	36.0114	Ascomycin
T0082	-72.3784	-68.418	-3.9604	7.1444	Domperidone
T2076	-72.2715	-65.6392	-6.6323	14.314	Pimavanserin
T1575	-72.2402	-56.1056	-16.1345	11.9089	Nizatidine
T6240	-72.2033	-62.1073	-10.096	15.3744	Palbociclib Isethionate
T3724	-72.1974	-64.1178	-8.0795	12.6929	Rolapitant hydrochloride
TMA2394	-72.1849	-71.8764	-0.3084	19.5593	DL-α-Tocopherol
T0101	-72.1708	-70.3316	-1.8392	12.8764	Doxazosin mesylate
T2388	-72.1681	-68.6622	-3.5059	16.3338	Nalfurafine hydrochloride
T1785	-72.1262	-61.1578	-10.9684	12.1928	Palbociclib
T4577	-72.1111	-68.2162	-3.8949	10.2719	Cariprazine
T1239	-72.1093	-64.2377	-7.8717	8.1259	Indacaterol maleate
T0806	-72.0757	-54.9526	-17.1231	9.9718	Flunarizine dihydrochloride
T6955	-72.0732	-61.1961	-10.877	4.3939	Propafenone HCl
T6670	-72.0301	-70.3221	-1.708	13.8652	Silymarin
T3489	-72.0133	-71.043	-0.9703	15.5768	Dasabuvir
T4980	-72.0122	-66.3592	-5.653	9.5482	Betrixaban maleate
T6199	-71.9916	-69.7836	-2.208	20.4138	Ribociclib
T7593	-71.9746	-73.6365	1.6619	8.5132	Levomefolate calcium
T7013	-71.9655	-71.4903	-0.4752	8.3208	Vorapaxar
T6453	-71.8825	-70.8276	-1.0549	21.8745	Conivaptan hydrochloride
T1648	-71.8715	-71.8977	0.0262	18.7713	Vitamin E
T3281	-71.8158	-62.5936	-9.2223	23.0352	Delapril?Hydrochloride
T2S0257	-71.7717	-74.9371	3.1654	15.3533	Dehydroandrographolide succinate
T0374L	-71.7477	-64.6755	-7.0722	15.7877	Sunitinib
T2526	-71.7303	-71.4685	-0.2618	20.7965	Ciclesonide
T0165	-71.6987	-67.3071	-4.3915	6.2716	Urapidil
T0381	-71.666	-51.7378	-19.9283	8.2682	Amodiaquine hydrochloride
T0157	-71.6598	-63.7449	-7.9148	3.1616	Roxatidine Acetate hydrochloride
T1197	-71.6205	-62.1962	-9.4244	18.1954	Trimebutine maleate
T1929	-71.5586	-64.528	-7.0305	4.9631	Filgotinib
T7584	-71.5303	-71.6172	0.0869	16.7584	zanubrutinib
T4341	-71.5208	-63.6486	-7.8722	9.7149	#N/A
T0827	-71.5154	-71.222	-0.2934	12.3067	Cefsulodine sodium
T6597	-71.4833	-59.3458	-12.1375	8.9203	Mosapride Citrate
T2A2481	-71.4439	-71.2993	-0.1446	15.5524	Taurochenodeoxycholic Acid
T3610	-71.4205	-49.9316	-21.4889	11.9283	Ranitidin
T6195	-71.4202	-70.188	-1.2322	23.0645	Baloxavir marboxil
T0951	-71.4175	-50.2154	-21.2021	9.9794	Hydroxychloroquine sulfate
T6S2023	-71.3587	-68.1904	-3.1683	13.8582	Harpagoside
T0180	-71.3348	-63.7166	-7.6183	20.9208	Benazepril hydrochloride
T0325	-71.3078	-66.3559	-4.952	4.7893	Diperodon hydrochloride
T7133	-71.259	-64.8148	-6.4442	7.1692	Anagliptin
T5135	-71.2396	-51.8364	-19.4032	8.6495	Fupentixol Dihydrochloride
T1475	-71.1853	-64.0151	-7.1703	22.4993	Fesoterodine fumarate
T6923	-71.1355	-62.5424	-8.5931	10.7489	Ozanimod
T4995	-71.1035	-67.6118	-3.4916	12.5031	Cefpirome sulfate
T0709	-71.1004	-63.1442	-7.9562	19.8401	Pimaricin
T22314	-71.0684	-62.8265	-8.2419	6.416	Doripenem
T4451	-71.0655	-72.2494	1.1839	10.1964	Estramustine phosphate sodium
T0148L	-70.9916	-70.847	-0.1447	18.0742	Folinic Acid Calcium Salt Pentahydrate
T1485	-70.9858	-71.3338	0.348	5.7451	Methotrexate
T3085	-70.8408	-64.2188	-6.622	10.2847	#N/A
T5330	-70.8161	-71.0285	0.2124	11.5132	Fluralaner
T8387	-70.7958	-63.2718	-7.5241	8.9954	Alectinib hydrochloride
T1190	-70.7913	-69.4831	-1.3082	10.1665	Cefmenoxime hydrochloride
T4226	-70.7529	-69.2976	-1.4553	21.0609	Amenamevir
T1132	-70.7403	-64.8025	-5.9379	7.3591	Nicergoline
T7394	-70.7364	-63.1822	-7.5542	5.602	#N/A
T6505	-70.7193	-56.1541	-14.5652	4.6384	Formoterol Hemifumarate
T0374	-70.7028	-63.6516	-7.0513	11.7448	Sunitinib Malate
T1208	-70.6733	-70.6727	-0.0006	9.1972	Citicoline sodium
T0903	-70.6644	-56.6463	-14.018	9.3066	Stugeron
T2564	-70.6431	-59.5875	-11.0556	6.7814	#N/A
T1213	-70.635	-73.1958	2.5607	26.8812
T0076	-70.6284	-59.7283	-10.9	10.1343
T0097L	-70.5744	-69.0998	-1.4746	8.2602
T0088	-70.5645	-66.9651	-3.5994	4.7891
T23133	-70.5553	-50.7746	-19.7807	7.3037
T17035	-70.5494	-68.5281	-2.0213	15.8814
T2456	-70.5356	-70.6025	0.067	7.522
T4977	-70.5125	-70.2798	-0.2327	9.1208
T6905	-70.4883	-67.6123	-2.876	88.9117
T1472	-70.4562	-63.9406	-6.5156	12.5553
T1090	-70.4461	-53.9749	-16.4713	9.8808
T2391	-70.4157	-62.2984	-8.1173	10.6421
T6S1966	-70.4144	-66.6113	-3.803	13.3637
T7043	-70.4071	-74.0408	3.6336	17.4573
T0062	-70.3815	-69.9338	-0.4477	8.9968
T6231	-70.3743	-70.081	-0.2932	7.5128
T6478	-70.3575	-62.8211	-7.5365	6.4754
T5857	-70.3142	-70.368	0.0538	29.8107
T1645	-70.3048	-66.4186	-3.8862	17.5855
T0866	-70.2786	-59.2782	-11.0004	6.3515
T7041	-70.2278	-62.8875	-7.3404	9.7261
T1227	-70.2274	-70.2881	0.0607	13.0747
T0254	-70.2136	-69.4879	-0.7258	47.0218
T1181	-70.2067	-64.7196	-5.4871	7.5804
T6288	-70.186	-62.6718	-7.5142	19.7842
T6825	-70.179	-69.8941	-0.2848	14.3508
T6120	-70.1779	-70.1134	-0.0645	13.2531
T1087	-70.1664	-56.107	-14.0595	14.6512
T8003	-70.1606	-69.7412	-0.4195	9.4502
T8128	-70.1554	-63.7131	-6.4423	3.5913
T1654	-70.1229	-52.0058	-18.1171	10.5857
T6101	-70.1145	-64.2088	-5.9057	13.4282
T3457	-70.0944	-56.5207	-13.5737	13.8003
T2499	-70.0882	-70.1337	0.0455	31.9957
T6544	-70.0073	-64.2352	-5.7721	15.4915
T0093L	-69.9696	-69.3916	-0.578	13.5536
T6930	-69.8659	-69.3177	-0.5482	8.1468
T2322	-69.8131	-70.3586	0.5455	25.0725
T5159	-69.7732	-58.5672	-11.2061	13.3356
T2394	-69.7534	-52.5551	-17.1982	14.5385
T1597	-69.7009	-64.9928	-4.7081	24.4294
T1766	-69.6849	-65.4337	-4.2512	6.7928
T4992	-69.6701	-72.155	2.4849	13.7425
T4117	-69.6663	-55.5283	-14.138	4.8699
T1176	-69.6378	-69.749	0.1112	13.0262
T0093	-69.6064	-68.9579	-0.6485	12.5173
T2364	-69.6054	-70.0216	0.4162	4.4422
T8654	-69.6001	-69.2437	-0.3564	9.8068
T2539	-69.5989	-55.0526	-14.5463	11.2242
T1627	-69.584	-49.0649	-20.5191	6.4396
T1222	-69.5592	-54.4398	-15.1194	7.9176
T0280	-69.5575	-60.0749	-9.4826	8.6234
T2556	-69.5442	-69.4472	-0.097	5.3304
T6020	-69.5124	-64.8748	-4.6376	6.0254
T6841	-69.5001	-69.8669	0.3667	20.9857
T1903	-69.4478	-68.9723	-0.4755	9.2539
T8239	-69.4193	-73.9931	4.5738	7.9069
T1656	-69.4069	-63.9659	-5.441	26.7601
T0154	-69.3032	-58.5861	-10.7171	4.0764
T2402	-69.2955	-62.758	-6.5374	11.0117
T5495	-69.2453	-54.442	-14.8033	5.6267
T6448	-69.2082	-62.351	-6.8571	14.8757
T7212	-69.1928	-68.192	-1.0008	7.9942
T1160	-69.1601	-72.3599	3.1998	21.805
T5858	-69.1536	-60.8319	-8.3217	10.1442
T0520	-69.1382	-69.2326	0.0944	6.4659
T1235	-69.1271	-61.7247	-7.4025	17.8885
T2795	-69.1236	-65.7142	-3.4094	7.6053
T0198	-69.1219	-70.7938	1.6719	8.4909
T1516	-69.1109	-63.4503	-5.6607	6.2006
T8062	-69.1029	-70.2375	1.1346	6.3041
T8482	-69.0799	-65.5086	-3.5712	12.5202
T7551	-69.0781	-56.9586	-12.1195	10.2312
T1736	-69.039	-68.6464	-0.3925	9.141
T0385	-68.994	-53.2732	-15.7208	5.4317
T0031L	-68.9771	-64.2381	-4.739	7.8962
T1242	-68.9607	-61.808	-7.1527	14.0674
T4991	-68.9108	-67.1937	-1.7171	10.8169
T2382	-68.9076	-67.851	-1.0566	7.0694
T2923	-68.9066	-67.1829	-1.7237	16.7483
T3004	-68.8793	-65.666	-3.2133	13.5035
T0447	-68.848	-57.458	-11.3899	12.0435
T0322	-68.7828	-59.8692	-8.9136	7.1877
T1088	-68.7622	-70.087	1.3249	14.2224
T2320	-68.7547	-56.6514	-12.1033	16.594
T2974	-68.7204	-58.4691	-10.2513	10.7841
T2392	-68.7084	-52.0715	-16.6369	3.4276
T6864	-68.6798	-67.6146	-1.0652	18.8524
T2125	-68.6726	-67.6867	-0.9859	30.7366
T0351	-68.6441	-65.2292	-3.4149	7.711
T4997	-68.6041	-62.1948	-6.4093	24.7393
T3623	-68.6003	-61.4974	-7.1029	9.7319
T5161	-68.5746	-64.3895	-4.1851	7.2584
T6179	-68.5662	-78.8527	10.2866	14.7656
T0136	-68.5293	-64.8027	-3.7267	11.2674
T0364	-68.5127	-61.73	-6.7827	9.6323
T0900	-68.4849	-62.4004	-6.0846	11.8399
T0216	-68.4722	-61.7449	-6.7273	9.6948
T6447	-68.4216	-58.7087	-9.7129	23.1184
T1260	-68.3916	-71.3042	2.9126	9.4381
T0519	-68.3325	-60.2528	-8.0797	12.829
T1277	-68.3248	-61.802	-6.5228	16.2663
T0805	-68.2309	-64.0889	-4.1421	15.0617
T6788	-68.218	-66.054	-2.164	16.7398
T3015	-68.1868	-67.2958	-0.8911	19.0146
T5394	-68.1564	-63.1641	-4.9923	6.7191
T1615	-68.1466	-64.4333	-3.7133	9.3425
T0112	-68.1173	-61.3017	-6.8156	12.2672
T7412	-68.0982	-58.2151	-9.8831	10.4857
T0348	-68.0951	-56.4412	-11.6539	3.3563
T5000	-68.0923	-66.4665	-1.6258	11.0202
T1037	-68.0803	-60.4952	-7.5851	8.3352
T2512	-68.0771	-68.5628	0.4857	8.2473
T0929	-68.0491	-69.8516	1.8025	20.8152
T2183	-68.0267	-60.049	-7.9777	64.5861
T1081	-68.025	-61.4797	-6.5454	18.3204
T8402	-68.0246	-66.5809	-1.4437	8.0688
T0231	-68.0043	-59.0667	-8.9375	15.6245
T3211	-67.9922	-67.5985	-0.3937	23.1526
T8404	-67.9917	-52.8303	-15.1614	9.4591
T0091	-67.9807	-66.1299	-1.8508	6.0249
T7975	-67.9503	-67.6	-0.3504	10.5318
T6439	-67.8879	-61.7306	-6.1574	12.2932
T1552	-67.8583	-60.8711	-6.9872	7.0538
T0031	-67.8533	-63.8771	-3.9763	9.1605
T1603	-67.8464	-69.3213	1.4748	7.1955
T6268	-67.7605	-70.5986	2.8381	8.9051
T1066	-67.7256	-63.8932	-3.8324	9.0964
T8399	-67.7007	-61.9123	-5.7883	12.3184
T2732	-67.657	-59.5839	-8.0731	6.4803
T4008	-67.6182	-64.4674	-3.1508	9.0339
T0782	-67.6053	-61.3655	-6.2398	5.0877
T0038	-67.5853	-59.2786	-8.3067	19.0561
T1835	-67.5401	-66.7588	-0.7813	10.4927
T7839	-67.4825	-60.1662	-7.3163	7.6602
T2762	-67.4818	-54.723	-12.7588	5.674
T2230	-67.4502	-64.0892	-3.361	10.1559
T6680	-67.4175	-60.0889	-7.3285	15.5832
T2899	-67.4129	-63.2335	-4.1794	8.6416
T8389	-67.4027	-48.2842	-19.1184	7.37
T1179	-67.3553	-57.9192	-9.4361	9.265
T7939	-67.3233	-53.26	-14.0633	8.6829
T0990	-67.3206	-63.4718	-3.8488	4.5711
T4999	-67.2805	-61.3342	-5.9464	9.9089
T5S0754	-67.2741	-63.3633	-3.9109	12.7259
T3233	-67.2714	-64.3382	-2.9332	15.305
T0342	-67.2168	-55.9452	-11.2715	8.6844
T0025	-67.1976	-62.8571	-4.3405	17.4488
T0868	-67.1975	-64.8604	-2.3371	8.4779
T1576	-67.1442	-66.7211	-0.4231	12.813
T0104	-67.1265	-61.057	-6.0695	14.2515
T2527	-67.0845	-66.4148	-0.6697	22.8558
T0194	-67.0827	-46.3988	-20.6838	8.972
T1110	-67.0562	-47.1004	-19.9558	14.3177
TQ0084	-67.0335	-56.8983	-10.1352	2.5769
T8397	-66.9936	-69.8101	2.8164	13.7444
T4094	-66.9935	-59.6253	-7.3681	17.3274
T6430	-66.9501	-66.3851	-0.565	17.8122
T0703	-66.9439	-61.4938	-5.4501	4.0404
T1439	-66.927	-66.2405	-0.6864	25.4738
T1049L	-66.9134	-59.7543	-7.1591	15.12
T7560	-66.8866	-67.0638	0.1772	13.5185
T6S0722	-66.7937	-62.9058	-3.888	11.3855
T2980	-66.7935	-59.8806	-6.9129	13.1821
T8146	-66.7721	-47.1878	-19.5843	4.7401
T1912	-66.6976	-65.9595	-0.7381	7.7936
T0056	-66.6791	-62.4891	-4.19	21.2747
T6357	-66.661	-58.4885	-8.1725	13.3713
T8689	-66.6504	-47.4246	-19.2258	10.799
T5153	-66.6438	-65.775	-0.8689	11.2881
T6112	-66.619	-66.2257	-0.3933	20.7907
T0378	-66.6042	-54.0439	-12.5603	10.1391
T0884	-66.5924	-64.6589	-1.9335	13.0146
T0118	-66.5523	-66.3699	-0.1824	9.6368
T5391	-66.5291	-58.9918	-7.5373	19.7329
T5784	-66.5034	-54.3334	-12.1701	10.5609
T1926	-66.4978	-66.4917	-0.0061	11.0388
T1676	-66.453	-67.781	1.328	14.814
T0464	-66.4091	-55.1633	-11.2458	11.907
T4481	-66.3951	-65.0447	-1.3504	7.8388
T1385	-66.3221	-55.7335	-10.5887	18.0049
T2844	-66.3034	-57.4165	-8.8869	10.1407
T1661	-66.2932	-56.5757	-9.7175	12.2893
T0103	-66.2881	-54.7111	-11.577	9.7466
T1792	-66.2731	-65.203	-1.0701	9.5968
T2132	-66.2612	-61.6898	-4.5714	9.1672
T0148	-66.2302	-65.4925	-0.7378	16.4894
T8416	-66.2222	-65.8193	-0.4029	5.8733
T0343	-66.1948	-63.3049	-2.8899	16.7587
T2562	-66.1824	-69.1608	2.9784	7.8019
T1193	-66.1099	-56.7823	-9.3276	12.5426
T6632	-66.0815	-66.8382	0.7567	8.5873
T1963	-66.0795	-65.4271	-0.6525	6.8571
T2316	-66.0611	-50.1662	-15.8948	8.4556
T2326	-66.0497	-65.7966	-0.2531	12.0992
T0055L	-66.0463	-50.446	-15.6003	4.857
T0057	-66.0444	-60.2507	-5.7938	12.5246
T2966	-66.0213	-65.5983	-0.423	24.0624
T6450	-65.9975	-69.9767	3.9792	37.5002
T0919	-65.9966	-55.0999	-10.8967	8.9845
T6542	-65.9806	-60.2698	-5.7108	22.2435
T6405	-65.9798	-61.6138	-4.366	8.3373
T1510	-65.9435	-69.637	3.6934	17.5374
T0237	-65.926	-65.971	0.045	8.9362
T1206	-65.9138	-56.9536	-8.9602	8.3345
T6316	-65.9082	-64.6092	-1.299	20.5682
T2447	-65.9046	-65.5436	-0.361	13.7577
T1174	-65.8633	-54.6642	-11.1991	8.5996
T6986	-65.8305	-65.5817	-0.2488	11.5916
T2871	-65.8096	-62.8279	-2.9816	13.0849
T1289	-65.7869	-67.2518	1.4649	31.7684
T6486	-65.749	-56.348	-9.401	13.9757
T6915	-65.7485	-65.5961	-0.1525	4.1388
T0811	-65.7365	-59.0314	-6.705	10.3558
T1024	-65.7233	-56.9363	-8.787	10.0336
T2542	-65.7098	-57.0741	-8.6357	5.0032
T1559	-65.6923	-65.266	-0.4262	22.6763
T0497	-65.6362	-57.2522	-8.384	9.8034
T6958	-65.6279	-57.0746	-8.5533	4.174
T1921	-65.5722	-65.4102	-0.162	15.8714
T0364L	-65.5536	-56.9661	-8.5876	11.5997
T2582	-65.552	-64.2009	-1.3511	10.3327
T1446	-65.5386	-58.2498	-7.2889	15.9322
T1049	-65.5095	-57.3565	-8.153	13.8957
T2197	-65.4938	-65.0093	-0.4845	51.1835
T2773	-65.486	-60.6366	-4.8493	45.077
T1619	-65.4696	-61.2446	-4.2249	6.3579
T2831	-65.4623	-65.8761	0.4137	23.516
T1142	-65.4362	-61.0958	-4.3403	30.9363
T0696	-65.4215	-60.9138	-4.5077	20.1047
T0055	-65.2901	-49.3591	-15.931	4.4165
T1782	-65.2871	-62.6576	-2.6295	8.3797
T1542	-65.2813	-50.858	-14.4233	18.2016
T7369	-65.2725	-61.678	-3.5945	21.6025
T7569	-65.2669	-57.6497	-7.6173	9.2062
T4546	-65.1904	-63.0442	-2.1462	11.8756
T1531	-65.16	-65.0103	-0.1496	25.7777
T6684	-65.0863	-48.693	-16.3933	5.1629
T2239	-65.0765	-67.6531	2.5766	19.8628
T7952	-65.0023	-58.2884	-6.7139	14.6765
T2383	-65.0019	-52.5811	-12.4208	10.4446
T1184	-64.9912	-64.1267	-0.8644	4.6645
T1127	-64.9771	-63.2955	-1.6816	25.2564
T2827	-64.9681	-64.3434	-0.6247	16.9815
T0139	-64.961	-59.0165	-5.9445	11.537
T5820	-64.9574	-54.5689	-10.3884	11.8885
T2016	-64.9328	-66.4522	1.5194	19.1946
T4602	-64.9109	-65.7666	0.8557	13.1818
T1626	-64.9012	-63.31	-1.5911	11.1614
T6744	-64.877	-59.2169	-5.6601	15.103
T4297	-64.8747	-57.5574	-7.3173	8.4729
T6472	-64.8477	-63.844	-1.0036	25.8806
T4284	-64.8267	-56.7207	-8.106	11.8869
T2571	-64.8002	-59.2494	-5.5508	14.3416
T1050	-64.7944	-62.2705	-2.5239	5.7756
T0462	-64.7861	-64.471	-0.3152	6.4914
T1086	-64.6681	-64.9118	0.2437	18.1745
T1418	-64.6659	-64.2266	-0.4393	14.436
T0373	-64.6655	-63.6101	-1.0554	8.1967
T6242	-64.623	-57.2051	-7.4179	8.4237
T2438	-64.5938	-62.7505	-1.8433	15.6205
T3213	-64.5717	-69.9427	5.3709	12.6399
T2656	-64.5474	-62.9943	-1.5532	8.2626
T2595	-64.4692	-65.0414	0.5722	4.6614
T5964	-64.4652	-68.6081	4.1429	13.8144
T8149	-64.417	-50.1469	-14.2701	5.1129
T0197	-64.3807	-61.4309	-2.9497	7.9214
T6S0107	-64.3734	-55.8868	-8.4867	2.2856
T6796	-64.3399	-64.0723	-0.2676	4.7328
T4552	-64.3226	-61.8011	-2.5215	7.3254
T2901	-64.3186	-62.7883	-1.5303	4.3577
T5051	-64.3019	-60.1396	-4.1624	31.1063
T12643	-64.2908	-62.8831	-1.4077	9.7827
T2025	-64.2622	-62.7257	-1.5365	3.8526
T1381	-64.2582	-62.7205	-1.5377	19.5649
T5023	-64.2538	-55.6146	-8.6392	16.6863
T1157	-64.2443	-62.1954	-2.0489	12.6758
T5995	-64.198	-64.4577	0.2597	6.2658
T3465	-64.1398	-63.214	-0.9258	11.2856
T0953	-64.0826	-63.938	-0.1447	7.1713
T0788	-64.0625	-46.9487	-17.1138	5.897
T1872	-64.0549	-63.6844	-0.3705	11.4512
T4874	-64.0083	-61.7244	-2.2839	11.5066
T3357	-64.0069	-63.6224	-0.3845	10.8276
T3524	-64.0033	-58.2627	-5.7406	3.9238
T5014	-63.9557	-60.6471	-3.3087	11.0002
T2815	-63.9502	-61.2925	-2.6578	8.3527
T6552	-63.9426	-63.6499	-0.2927	8.7594
T0896	-63.8738	-56.9707	-6.9032	5.7766
T3170	-63.863	-65.7482	1.8851	9.5578
T0911	-63.8547	-65.1923	1.3376	11.3344
T8143	-63.7886	-52.6802	-11.1085	24.3849
T0981	-63.7775	-56.2105	-7.567	13.1577
T3441	-63.7636	-56.3444	-7.4192	7.2763
T0261	-63.7599	-63.6157	-0.1442	21.4974
T6952	-63.7518	-53.9528	-9.799	11.4935
T1464	-63.7235	-58.3475	-5.376	13.4879
T8666	-63.6501	-54.6784	-8.9717	5.8084
T1006	-63.605	-57.5461	-6.0589	17.5855
T7733	-63.5987	-64.5147	0.916	13.7313
T2583	-63.5589	-60.9645	-2.5944	6.2225
T0818	-63.5141	-45.7122	-17.802	7.6146
T6602	-63.4901	-55.024	-8.4661	9.34
T8046	-63.4859	-56.4698	-7.0161	8.3919
T2389	-63.4605	-57.7224	-5.7381	7.4576
T0907	-63.4561	-64.5417	1.0857	8.9507
T2534	-63.4472	-65.1609	1.7137	13.1357
T4200	-63.4447	-66.8087	3.3641	9.7882
T4574	-63.442	-66.4865	3.0446	12.3536
T0687	-63.3993	-63.3838	-0.0156	27.8746
T0142	-63.3489	-52.7679	-10.581	3.2091
T2239L	-63.3372	-65.8681	2.5308	18.5034
T2938	-63.2651	-59.5802	-3.6849	14.6345
T8709	-63.2541	-63.0633	-0.1908	4.0456
T5171	-63.24	-64.3124	1.0724	10.1512
T2317	-63.228	-55.4104	-7.8177	6.1974
T1533	-63.2037	-53.7304	-9.4733	6.3465
T3547	-63.1917	-60.0737	-3.118	6.5714
T0181	-63.1886	-62.9417	-0.2469	24.8855
T8358	-63.1723	-47.3968	-15.7755	4.4632
T1093	-63.1415	-63.6079	0.4663	15.7216
T1593	-63.1361	-62.1309	-1.0052	12.4617
T1163	-63.1247	-61.0205	-2.1042	24.7198
T6968	-63.11	-61.0623	-2.0477	7.4008
T0023	-63.0837	-54.8469	-8.2368	23.1842
T6233	-63.0615	-62.8105	-0.251	4.7082
T6502	-63.0367	-60.5264	-2.5103	17.31
T1519	-63.0312	-62.2619	-0.7693	3.7717
T4551	-63.0295	-58.0481	-4.9813	6.4566
T6998	-63.0207	-64.4905	1.4698	8.6603
T3429	-63	-51.3743	-11.6258	0
T6S0659	-62.9729	-56.756	-6.2169	9.2656
T7093	-62.956	-62.1661	-0.7899	3.9797
T14856	-62.9295	-61.9222	-1.0073	13.2497
T2728	-62.9226	-58.8223	-4.1003	4.1658
T1551	-62.9059	-52.4168	-10.4891	4.3365
T2485	-62.9042	-61.542	-1.3621	9.4347
T1499	-62.8966	-61.6806	-1.216	17.9285
T6943	-62.8957	-62.2254	-0.6703	9.0097
T4506	-62.886	-52.9018	-9.9843	13.329
T0786	-62.858	-54.2195	-8.6385	11.7881
T7000	-62.8556	-59.2913	-3.5643	9.4844
T2957	-62.8357	-59.7605	-3.0752	10.5214
T2406	-62.8279	-51.5784	-11.2495	6.9048
T1320	-62.8139	-57.602	-5.2119	18.6902
T0187	-62.811	-54.9364	-7.8746	16.1791
T2671	-62.7985	-61.7395	-1.059	4.6385
T1201	-62.7714	-54.4443	-8.3272	7.51
T7804	-62.7504	-57.8939	-4.8565	21.434
T0270	-62.7056	-60.5724	-2.1332	19.2893
T0999	-62.6743	-61.3894	-1.2848	15.8592
T8403	-62.6711	-52.2105	-10.4606	8.0834
T1061	-62.653	-62.1875	-0.4655	10.0004
T1070	-62.6476	-64.261	1.6134	8.9423
T6106	-62.6304	-63.4343	0.8039	4.5074
T6006	-62.6029	-62.5837	-0.0192	23.0014
T6499	-62.5443	-62.4082	-0.1362	10.232
T0713	-62.5293	-58.1066	-4.4227	14.573
T6713	-62.5257	-61.4688	-1.0569	13.7486
T1012	-62.5208	-53.5979	-8.9229	9.653
T1890	-62.5196	-57.5544	-4.9652	10.1271
T2588	-62.5147	-62.5131	-0.0016	22.3025
T13072	-62.4966	-60.6689	-1.8277	10.3964
T0072	-62.4271	-56.3515	-6.0756	9.4903
T1519L	-62.407	-61.1936	-1.2135	7.7508
T1352	-62.3508	-66.134	3.7831	6.2806
T1331	-62.3261	-63.3582	1.0321	13.1459
T0211L	-62.3158	-57.0767	-5.239	8.7882
T0230	-62.246	-51.433	-10.813	10.3247
T2339	-62.2237	-62.1969	-0.0268	13.5218
T6880	-62.2079	-62.545	0.3371	12.0087
T2789	-62.1308	-64.4496	2.3188	7.4927
T4460	-62.1303	-57.5667	-4.5636	8.2555
T2318	-62.1259	-65.1282	3.0023	26.351
T0835	-62.1062	-54.6133	-7.4928	9.5957
T0412	-62.1003	-61.5751	-0.5252	10.9735
T6387	-62.0786	-60.8227	-1.2559	18.5902
T2O2666	-62.0391	-61.3886	-0.6505	12.4553
T0167	-62.0318	-52.458	-9.5738	7.8477
T4462	-62.0123	-59.9521	-2.0603	10.3208
T3273	-61.9984	-60.5425	-1.4559	17.9776
T1502	-61.9675	-51.931	-10.0365	4.6752
T5030	-61.9489	-64.9366	2.9877	9.803
T0168	-61.9342	-61.932	-0.0023	3.7563
T6547	-61.9113	-55.3519	-6.5593	9.27
T0111	-61.8998	-53.4018	-8.4979	23.273
T6906	-61.8916	-52.3473	-9.5443	8.7335
T2182	-61.8732	-52.2139	-9.6593	7.0217
T0937	-61.8269	-60.8659	-0.961	11.7685
T1224	-61.8261	-62.2699	0.4439	8.7375
T6218	-61.7965	-58.9524	-2.8441	4.0979
T1389	-61.7716	-54.7492	-7.0224	2.7826
T1484L	-61.7666	-54.1169	-7.6497	17.7502
T7405	-61.7154	-53.6505	-8.0649	16.1523
T0098	-61.6838	-54.6255	-7.0583	12.0723
T5008	-61.6746	-61.5872	-0.0875	13.9606
T1129	-61.6194	-63.6939	2.0746	10.8296
T8651	-61.5939	-61.5668	-0.0271	10.7535
T6272	-61.5906	-60.469	-1.1216	5.6552
T2574	-61.5768	-55.634	-5.9427	7.5971
T6374	-61.553	-60.7371	-0.8159	26.4046
T0372	-61.479	-53.8314	-7.6476	8.3069
T1207	-61.4555	-59.7114	-1.7441	13.386
T2589	-61.448	-54.7551	-6.6928	6.8792
T0794	-61.4453	-54.9526	-6.4927	10.3937
T2553	-61.4137	-59.6669	-1.7468	4.8687
T1461	-61.4132	-65.1228	3.7097	15.6464
T8393	-61.3484	-62.2869	0.9386	8.941
T5016	-61.345	-56.5013	-4.8437	5.699
T2775	-61.3128	-60.8125	-0.5003	10.4051
T8039	-61.2382	-56.8843	-4.3539	2.5564
T1487	-61.1561	-63.0614	1.9053	13.978
T2531	-61.1518	-66.0414	4.8896	13.2764
T0373L	-61.1408	-60.7614	-0.3794	8.9057
T2742	-61.099	-58.8828	-2.2162	16.9004
T1894	-61.0947	-61.0127	-0.082	8.5278
T1204	-61.0786	-60.6903	-0.3883	16.1023
T6S1369	-61.0681	-57.0368	-4.0313	11.5566
T0672	-61.0642	-62.7536	1.6893	16.3185
T2590	-61.057	-61.0262	-0.0309	9.754
T7555	-61.0169	-51.3557	-9.6612	15.2474
T2399	-61.0077	-61.0077	0	12.6276
T6529	-61.0028	-61.6249	0.6221	21.5123
T1211	-60.9905	-52.803	-8.1875	9.2431
T6S1665	-60.9838	-59.9818	-1.0019	15.5661
T0116	-60.9678	-52.9658	-8.002	17.2151
T0455	-60.958	-45.5925	-15.3654	10.9873
T0420	-60.9151	-54.4766	-6.4385	7.1982
T3857	-60.9113	-60.0162	-0.8951	9.7618
T6S1373	-60.8946	-55.9765	-4.918	13.2745
T0992	-60.8909	-64.1437	3.2528	16.1552
T0268	-60.8854	-52.3667	-8.5187	14.6038
T0727	-60.8772	-59.6013	-1.2759	11.3974
T0369	-60.8623	-60.8832	0.021	7.4501
T2360	-60.818	-60.3691	-0.4489	7.8362
T8134	-60.7991	-63.5791	2.78	8.9265
T2404	-60.7954	-50.8649	-9.9305	9.7362
T2554	-60.7891	-60.6843	-0.1048	11.5922
T0102	-60.7408	-50.4102	-10.3306	6.5824
T3246	-60.7221	-53.1451	-7.577	7.9459
T22459	-60.714	-49.6265	-11.0875	9.8553
T5038	-60.6986	-61.1916	0.493	7.1748
T0222	-60.6956	-52.7629	-7.9328	6.4276
T0324	-60.6907	-47.9018	-12.7889	9.5943
T0253	-60.661	-52.534	-8.127	7.0733
T8010	-60.6044	-60.6531	0.0488	10.501
T1433	-60.5952	-47.6551	-12.9401	5.6879
T0188	-60.5893	-59.139	-1.4503	21.584
T1243	-60.5736	-60.1242	-0.4494	15.0552
T7126	-60.5734	-56.9973	-3.5761	11.2829
T6411	-60.5611	-54.0927	-6.4684	8.0778
T1747	-60.5528	-57.0075	-3.5452	3.3361
T1452	-60.5083	-60.5188	0.0105	4.5162
T5003	-60.4934	-61.4465	0.9531	35.0126
T3121	-60.4753	-59.5117	-0.9637	13.3059
T1332	-60.4702	-59.4795	-0.9907	12.7157
T0402	-60.4694	-60.2751	-0.1943	13.242
T6307	-60.4673	-60.2809	-0.1864	13.6803
T6452	-60.4364	-62.0524	1.616	5.3507
T0242	-60.4346	-49.6823	-10.7523	9.6153
T8413	-60.4277	-51.7584	-8.6693	6.171
T0485	-60.3877	-60.4925	0.1048	20.8987
T0864	-60.3699	-57.8827	-2.4872	14.0194
T0771	-60.3678	-60.2108	-0.157	27.6157
T0962	-60.3535	-50.931	-9.4224	5.0772
T0380	-60.351	-59.645	-0.706	11.2547
T6651	-60.297	-50.3444	-9.9527	7.19
T6237	-60.2901	-49.3874	-10.9027	10.7602
T1192	-60.2666	-63.3968	3.1301	8.2638
T2212	-60.2615	-57.36	-2.9015	9.5172
T0760	-60.256	-60.1617	-0.0942	17.9643
T6301	-60.2552	-64.8741	4.6189	19.7655
T1646	-60.2403	-56.5222	-3.7181	8.8222
T1561	-60.2297	-59.4911	-0.7386	16.5875
T0435	-60.2278	-59.9405	-0.2873	6.4442
T0226	-60.2161	-53.3084	-6.9077	6.253
T1460	-60.2007	-50.0662	-10.1345	21.7025
T4568	-60.1883	-53.2363	-6.952	7.4415
T2725	-60.1745	-51.288	-8.8865	5.4801
T0932	-60.1544	-64.0919	3.9375	6.5357
T0215L	-60.1478	-61.8352	1.6874	9.4783
T1292	-60.1452	-58.9147	-1.2305	13.6814
T3704	-60.1448	-50.46	-9.6849	14.8043
T2163	-60.1424	-56.7581	-3.3843	7.0634
T2387	-60.1343	-51.5674	-8.5669	13.2922
T1102	-60.1326	-59.2463	-0.8864	9.6804
T4493	-60.1293	-60.7961	0.6667	3.9507
T0327	-60.1026	-52.5632	-7.5394	11.245
T6467	-60.0972	-42.3424	-17.7547	5.0922
T0384	-60.0612	-58.1952	-1.866	2.7159
T0143	-60.0295	-52.7002	-7.3294	6.2901
T3039	-60.026	-61.8657	1.8397	21.6297
T0317	-59.9842	-52.5757	-7.4085	7.5377
T0334	-59.9803	-60.0493	0.0691	6.2627
T1145	-59.9645	-42.777	-17.1875	8.2847
T2P2810	-59.9089	-59.723	-0.1859	8.0102
T0970	-59.9084	-51.8735	-8.0349	11.3815
T1180	-59.8835	-54.3119	-5.5716	6.0531
T8070	-59.8649	-59.1657	-0.6992	14.4851
T0947	-59.8166	-59.219	-0.5975	12.8959
T4503	-59.8047	-60.8511	1.0464	5.0531
T1118	-59.7957	-51.8919	-7.9038	10.8538
T8388	-59.783	-49.2236	-10.5594	7.6073
T7533	-59.7595	-43.08	-16.6795	1.173
T1186	-59.7523	-50.7039	-9.0484	16.1703
T6631	-59.7484	-52.2004	-7.548	11.465
T8063	-59.7406	-58.3078	-1.4328	21.2436
T2885	-59.6728	-58.1893	-1.4835	2.9036
T6565	-59.5943	-53.5841	-6.0103	6.2465
T1528	-59.589	-54.9711	-4.6179	19.0408
T0375	-59.5876	-52.0001	-7.5875	4.0293
T2865	-59.5746	-63.0211	3.4465	13.9593
T4333	-59.5541	-51.9479	-7.6062	11.2969
T3529	-59.546	-51.1485	-8.3975	6.5213
T0049	-59.5443	-62.057	2.5126	10.1258
T2296	-59.5366	-48.8028	-10.7338	16.2219
T0905	-59.5182	-58.7167	-0.8015	8.058
T3117	-59.5116	-56.8875	-2.6241	2.2828
T7808	-59.4633	-60.9234	1.4601	21.0408
T1042	-59.4541	-51.7821	-7.672	1.48
T1057	-59.4357	-63.0826	3.6469	16.1436
T4510	-59.4334	-37.4734	-21.96	4.9676
T8398	-59.4287	-50.3786	-9.0501	9.4222
T2305	-59.4207	-59.3399	-0.0808	17.7429
T0460	-59.3729	-50.3142	-9.0587	5.7459
T1412	-59.3725	-43.7444	-15.6281	3.2067
T3625	-59.3705	-61.066	1.6955	20.1046
T1669	-59.3514	-55.397	-3.9544	6.3129
T1304	-59.3291	-57.6343	-1.6948	29.6552
T5S2178	-59.2941	-58.6589	-0.6352	29.4892
T0336	-59.2787	-58.6926	-0.5861	9.3539
T1567	-59.2669	-42.6317	-16.6353	68.0007
T0173	-59.2667	-47.2541	-12.0125	7.4902
T1492	-59.2046	-52.0884	-7.1162	7.5149
T2231	-59.1886	-58.8451	-0.3435	5.6648
T1257	-59.1878	-52.0879	-7.0999	6.1574
T1109	-59.1692	-54.9921	-4.1771	5.8423
T1092	-59.149	-48.4946	-10.6544	15.3816
T6956	-59.1376	-57.2991	-1.8385	8.4332
T1622	-59.1179	-59.9916	0.8737	8.2516
T0299	-59.1055	-51.7573	-7.3483	7.4591
T1005L	-59.0593	-52.0082	-7.0511	6.523
T8125	-59.0503	-55.6048	-3.4455	18.5783
T6675	-59.0288	-63.2432	4.2144	10.1891
T1107	-58.9918	-54.2921	-4.6997	7.6356
T0147	-58.9906	-51.1315	-7.8591	20.3359
T6647	-58.9591	-51.0847	-7.8744	7.7173
T6165	-58.955	-57.2418	-1.7132	10.5655
T4538	-58.9311	-63.7982	4.8671	8.7881
T0512	-58.9213	-58.9638	0.0425	10.7349
T6716	-58.9211	-64.5514	5.6302	39.9789
T0963	-58.9182	-49.5484	-9.3699	5.9275
T6326	-58.9154	-37.6072	-21.3082	0.8956
T0177	-58.9096	-48.934	-9.9756	5.4211
T6710	-58.9011	-49.2425	-9.6586	6.4207
T1457	-58.8926	-58.9271	0.0345	4.1737
T7938	-58.8728	-51.2739	-7.5988	18.0565
T1121	-58.8643	-57.2842	-1.5801	10.4984
T4121	-58.8431	-57.2906	-1.5525	7.6564
T0337	-58.8134	-57.5953	-1.2182	15.9608
T1503	-58.7998	-49.6781	-9.1217	4.2696
T1495	-58.7907	-52.9666	-5.8241	8.6565
T0690	-58.7907	-51.9828	-6.8079	11.834
T7964	-58.7718	-53.4493	-5.3226	7.3622
T2759	-58.7535	-56.6258	-2.1277	10.7591
T6002	-58.7468	-58.9774	0.2306	10.7009
T1321	-58.6878	-54.8533	-3.8345	6.0226
T8301	-58.6756	-59.0791	0.4035	16.9621
T2401	-58.661	-45.8532	-12.8079	9.1363
T0367	-58.6514	-55.9712	-2.6802	23.0035
T1653	-58.6492	-53.6813	-4.9679	10.8642
T2508	-58.6417	-54.6177	-4.0241	6.0476
T2963	-58.5999	-57.2149	-1.385	16.7916
T1988	-58.5623	-57.2885	-1.2738	7.3231
T5032	-58.5059	-58.2006	-0.3053	7.8585
T3996	-58.4601	-54.2015	-4.2586	9.1514
T5570	-58.4334	-59.1001	0.6666	7.8708
T6192	-58.3813	-45.2436	-13.1377	11.8613
T0224	-58.3712	-49.2487	-9.1224	16.0517
T0365	-58.3568	-50.1231	-8.2337	17.1185
T0366	-58.334	-51.3568	-6.9773	8.0937
T2385	-58.3338	-53.7415	-4.5923	4.7228
T6414	-58.3309	-56.7	-1.6309	17.1283
T0269	-58.3146	-57.7104	-0.6042	10.0822
T4313	-58.3062	-47.9209	-10.3853	14.0541
T1076	-58.2995	-55.4699	-2.8296	16.6948
T7176	-58.2812	-51.6341	-6.6471	2.957
T1789	-58.2647	-58.1125	-0.1523	35.3504
T2115	-58.2156	-58.0692	-0.1464	3.1215
T1467	-58.2116	-58.4513	0.2397	19.4249
T0862	-58.2106	-50.9715	-7.2391	9.131
T1410	-58.2019	-50.8395	-7.3623	7.9989
T0094	-58.1903	-57.4649	-0.7254	18.6791
T0375L	-58.1882	-49.992	-8.1962	9.4901
T0518	-58.1822	-60.032	1.8498	17.9448
T6892	-58.1592	-51.0435	-7.1157	7.301
T1217	-58.1465	-49.8106	-8.3359	9.2058
T0719	-58.134	-47.5825	-10.5515	15.3819
T0912L	-58.1216	-59.6812	1.5595	20.5844
T0214	-58.1022	-58.8106	0.7084	7.4138
T1293	-58.091	-49.2819	-8.809	13.373
T1343L	-58.0802	-51.7398	-6.3405	14.575
T8349	-58.058	-57.2033	-0.8547	9.505
T2914	-58.0493	-52.1225	-5.9268	4.5392
T2332	-58.0364	-59.3672	1.3308	13.4534
T0912	-58.0316	-56.5798	-1.4518	27.5686
T0099	-58.0093	-50.8785	-7.1308	17.9347
T1282	-57.992	-46.59	-11.4021	5.1179
T6406	-57.9665	-50.9557	-7.0108	13.9208
T1101	-57.9568	-58.0907	0.1338	24.8103
T1031	-57.9489	-59.6149	1.6659	7.9676
T4981	-57.9458	-50.238	-7.7078	11.6225
T0214L	-57.9427	-58.4147	0.472	4.1213
T2142	-57.9342	-50.7485	-7.1857	7.0143
T2333	-57.933	-46.6205	-11.3125	18.8169
T1203	-57.9234	-45.1958	-12.7276	7.6427
T0377	-57.9218	-57.6047	-0.3171	8.9053
T3231	-57.9188	-49.9368	-7.9819	7.2682
T0841	-57.841	-56.1278	-1.7132	7.8146
T0178	-57.8035	-46.0521	-11.7514	11.4295
T2850	-57.787	-47.4824	-10.3046	4.1208
T0757	-57.7741	-57.4856	-0.2886	8.9845
T2533	-57.7701	-48.4153	-9.3548	8.2712
T4093	-57.768	-47.9634	-9.8045	4.9401
T1149	-57.7479	-57.4495	-0.2984	12.2612
T0036	-57.7382	-62.2144	4.4762	4.376
T1029	-57.7288	-60.0568	2.328	9.425
T1095	-57.6998	-54.4768	-3.223	16.8899
T5007	-57.6744	-50.7133	-6.9611	9.2237
T6349	-57.667	-49.5568	-8.1102	14.3667
T0810	-57.6541	-37.1875	-20.4666	1.7999
T1723	-57.6251	-50.6032	-7.0219	4.4739
T4063	-57.6139	-56.1585	-1.4554	11.6769
T4056	-57.6105	-42.3797	-15.2308	7.6212
T1023	-57.6081	-57.6258	0.0177	13.8542
T0331	-57.604	-54.613	-2.991	11.1281
T1411	-57.5938	-47.9362	-9.6576	3.9235
T1334	-57.5686	-48.9437	-8.6249	16.0431
T4463	-57.5436	-54.0812	-3.4624	4.4036
T0475	-57.5375	-49.4602	-8.0773	4.9643
T0266	-57.5369	-49.4469	-8.0901	15.0213
T0107	-57.5331	-56.5994	-0.9338	17.4194
T0215	-57.5217	-60.2897	2.768	10.4846
T4429	-57.519	-51.8103	-5.7087	5.8465
T7333	-57.474	-52.1905	-5.2835	9.5219
T2782	-57.4677	-52.0687	-5.399	6.4103
T2917	-57.4555	-49.5019	-7.9536	30.9703
T5004	-57.434	-50.9301	-6.5039	15.4945
T0798	-57.4297	-54.5934	-2.8363	13.2952
T6702	-57.4161	-48.6124	-8.8037	4.99
T1614	-57.3957	-54.8597	-2.536	19.216
T2548	-57.3903	-54.6033	-2.787	20.775
T6336	-57.379	-46.3552	-11.0239	9.7429
T7002	-57.3463	-50.2657	-7.0807	14.6167
T1408	-57.3216	-55.537	-1.7846	7.773
T2718	-57.2979	-50.1124	-7.1856	10.4422
T1062	-57.2626	-55.8388	-1.4238	10.2448
T2329	-57.2596	-59.9271	2.6675	2.9644
T1328	-57.2504	-50.552	-6.6984	15.0372
T0375L2	-57.243	-49.6483	-7.5948	8.1056
T2970	-57.233	-57.2195	-0.0135	4.4677
T0292	-57.2108	-44.7923	-12.4185	14.5393
T0988	-57.1862	-42.2809	-14.9052	9.0058
T6386	-57.1742	-51.1997	-5.9745	9.1501
T2793	-57.1739	-49.9038	-7.2701	4.6664
T3254	-57.1706	-55.831	-1.3396	10.8713
T8384	-57.1542	-48.3252	-8.829	13.3401
T0405	-57.1529	-23.3948	-33.7581	0
T0249	-57.1476	-50.3769	-6.7708	5.268
T6665	-57.1376	-55.8998	-1.2377	6.1849
T0820	-57.1064	-55.051	-2.0554	20.6822
T2522	-57.1058	-48.7641	-8.3416	19.8948
T1573	-57.0999	-55.3313	-1.7685	13.8015
T1312	-57.0864	-58.5405	1.4542	13.2666
T0902	-57.0856	-53.4894	-3.5962	5.1032
T0685	-57.0626	-56.8916	-0.171	11.537
T0683	-57.0496	-54.6244	-2.4252	17.3944
T1170	-57.0388	-49.5272	-7.5116	9.4974
T6696	-57.025	-55.7267	-1.2983	3.1238
T3284	-57.0224	-47.6394	-9.383	4.8901
T0700	-57.0139	-59.5589	2.545	20.8461
T8396	-56.9904	-55.2763	-1.7142	11.1205
T4537	-56.9827	-56.2359	-0.7467	18.8916
T6723	-56.9573	-43.4236	-13.5337	7.5301
T2758	-56.9487	-54.7697	-2.179	29.7821
T1171	-56.9333	-54.188	-2.7453	16.6019
T5S0802	-56.9261	-50.8567	-6.0694	4.682
T3145	-56.8868	-48.8886	-7.9982	7.7481
T2134	-56.8802	-45.6155	-11.2647	0.9014
T0723	-56.8793	-49.8778	-7.0016	5.2882
T0749	-56.853	-57.297	0.444	9.3971
T7902	-56.8316	-56.5713	-0.2603	19.097
T2216	-56.8272	-50.7543	-6.073	9.364
T1651	-56.8157	-56.0675	-0.7482	7.4884
T1122	-56.8017	-57.5344	0.7327	11.4491
T5376	-56.7699	-56.9751	0.2052	12.5748
T6758	-56.7397	-46.2241	-10.5155	9.0377
T1666	-56.729	-54.6865	-2.0425	12.3702
T0428	-56.7104	-50.5966	-6.1138	6.1972
T3362	-56.7075	-52.576	-4.1315	9.8904
T6646	-56.681	-58.8211	2.1401	11.3292
T4P2931	-56.6719	-58.3657	1.6938	7.0545
T0433	-56.6688	-56.4005	-0.2683	5.5262
T3979	-56.6672	-49.2481	-7.4191	8.6549
T0483	-56.6485	-42.3483	-14.3002	7.7378
T1001	-56.6225	-57.9267	1.3042	9.3806
T0135	-56.6155	-56.8029	0.1874	4.9367
T0203	-56.5976	-47.0037	-9.5938	6.7991
T1077	-56.5973	-46.839	-9.7582	9.6978
T6648	-56.5944	-49.5238	-7.0707	9.8667
T2O2667	-56.5824	-55.3162	-1.2661	8.7944
T1336	-56.5807	-48.6566	-7.9241	5.5695
T0814	-56.5348	-51.4885	-5.0463	5.2716
T1422	-56.5261	-53.2024	-3.3238	10.6951
T1756	-56.5175	-56.1005	-0.4169	7.6789
T1173	-56.4846	-47.9777	-8.5069	3.1468
T8064	-56.4719	-53.9427	-2.5292	6.1404
T0320	-56.4561	-56.5406	0.0845	8.8692
T1275	-56.4515	-48.2388	-8.2127	8.5481
T2269	-56.4416	-57.4731	1.0315	3.2096
T2765	-56.4358	-57.2667	0.8309	4.9358
T8385	-56.4092	-54.5382	-1.871	7.5421
T6127	-56.3996	-53.2558	-3.1438	1.434
T2131	-56.3959	-45.2076	-11.1883	10.5747
T0484	-56.3814	-55.2603	-1.1211	5.658
T1596	-56.3694	-55.4929	-0.8765	14.3967
T0799	-56.3554	-50.9491	-5.4064	4.3207
T0208	-56.3539	-55.4364	-0.9174	16.9976
T1652	-56.344	-53.7986	-2.5454	16.9904
T6221	-56.2977	-47.7344	-8.5633	5.2052
T1822L	-56.2918	-49.893	-6.3987	5.1837
T2396	-56.2842	-58.8218	2.5377	12.4183
T0768	-56.2809	-43.9277	-12.3532	2.4926
T1091	-56.2786	-56.3482	0.0696	14.0696
T1568	-56.275	-40.7922	-15.4828	9.1985
T14495	-56.2742	-58.8057	2.5315	12.3806
T4572	-56.2501	-53.7274	-2.5227	9.6368
T4501	-56.2373	-57.1707	0.9334	4.2547
T0338	-56.2328	-44.3963	-11.8365	9.1213
T1562	-56.2322	-58.2312	1.999	7.3695
T1290	-56.2125	-55.0346	-1.1779	7.0979
T6340	-56.1796	-50.2002	-5.9794	11.5239
T1097	-56.1739	-54.8619	-1.312	12.9572
T2136	-56.1736	-55.9199	-0.2537	8.8365
T2836	-56.1424	-48.4217	-7.7207	4.8088
T6482	-56.1279	-59.045	2.9171	8.7509
T1294	-56.0895	-53.7389	-2.3506	17.572
T2832	-56.0836	-45.7753	-10.3082	12.3005
T6890	-56.0809	-47.9045	-8.1764	12.147
T1169	-56.0407	-53.9989	-2.0419	8.3019
T0814L	-56.0295	-46.2812	-9.7482	7.8147
T1398	-56.021	-55.4501	-0.571	7.6978
T6461	-55.9941	-48.8949	-7.0992	9.2091
T1072	-55.9844	-49.3266	-6.6577	9.952
T2884	-55.9741	-53.7916	-2.1826	10.9635
T1276	-55.9728	-52.2813	-3.6915	11.5727
T5006	-55.9539	-60.1576	4.2037	8.555
T6493	-55.9509	-50.2368	-5.7141	9.5683
T5515	-55.9446	-68.5216	12.577	8.1708
T6096	-55.9392	-49.6342	-6.3049	5.0019
T2226	-55.9389	-46.7866	-9.1524	4.6711
T1286	-55.9389	-49.5694	-6.3695	15.3
T0040	-55.9313	-55.0357	-0.8956	5.302
T6436	-55.9252	-48.7489	-7.1763	6.5805
T1486	-55.923	-49.4535	-6.4695	8.558
T5005	-55.9153	-48.5443	-7.371	6.2517
T1625	-55.91	-46.8289	-9.0811	22.0347
T0344	-55.9047	-55.203	-0.7017	6.1859
T0427	-55.888	-48.4975	-7.3905	3.7618
T0726	-55.8802	-47.6718	-8.2084	5.52
T1734	-55.8569	-54.6168	-1.2401	6.3836
T2804	-55.8279	-55.7202	-0.1077	15.7792
T1636	-55.8278	-48.1705	-7.6573	5.2585
T1687L	-55.8121	-55.1055	-0.7066	21.8444
T0994	-55.7899	-46.7546	-9.0353	5.7782
T7503	-55.7854	-54.6135	-1.1718	9.6101
T2122	-55.7841	-55.7841	0	6.2388
T1546	-55.7817	-51.6302	-4.1516	4.435
T0083	-55.78	-55.0684	-0.7117	5.85
T2515	-55.7786	-58.1547	2.3761	6.8633
T4979	-55.7786	-50.6349	-5.1437	10.3842
T6198	-55.7751	-58.2774	2.5023	3.5252
T2780	-55.7531	-53.7643	-1.9888	6.4393
T1005	-55.7488	-50.469	-5.2798	6.7752
T1563	-55.7406	-53.9318	-1.8088	5.1841
T1617	-55.724	-52.8185	-2.9055	10.715
T0472	-55.7184	-45.7759	-9.9425	9.5699
T1822	-55.7176	-49.5477	-6.1699	4.3759
T2965	-55.6992	-54.9096	-0.7896	14.496
T1780	-55.6905	-53.1856	-2.5049	7.378
T6620	-55.6861	-52.6684	-3.0177	11.5369
T6963	-55.6772	-44.2036	-11.4736	11.2105
T0391	-55.6516	-55.279	-0.3725	5.096
T0836	-55.6307	-54.8669	-0.7638	5.2989
T1738	-55.6247	-46.9587	-8.666	7.1621
T4017	-55.6213	-47.0056	-8.6157	4.505
T5S1569	-55.6061	-56.9749	1.3688	15.3455
T0161	-55.5888	-55.9804	0.3916	7.767
T1158	-55.5844	-45.6789	-9.9055	11.3306
T8383	-55.5368	-46.7382	-8.7986	7.9951
T1172	-55.5284	-55.4975	-0.0309	9.9854
T2330	-55.5244	-54.4713	-1.0531	6.7067
T2A2509	-55.5036	-56.0216	0.518	8.9797
T7581	-55.4979	-54.3142	-1.1837	8.252
T6215	-55.4965	-54.4462	-1.0503	4.3642
T0476	-55.4917	-54.4379	-1.0539	3.399
T2549	-55.4869	-42.8409	-12.646	1.6521
T6929	-55.4604	-55.2984	-0.162	6.5984
T0717L	-55.4446	-53.0739	-2.3707	12.0881
T4405	-55.4025	-61.833	6.4304	12.1432
T0985	-55.3408	-57.9397	2.5989	5.2501
T2968	-55.3365	-54.9391	-0.3974	20.0857
T0183	-55.3176	-44.5624	-10.7552	18.2969
T2756	-55.2798	-53.4585	-1.8213	6.5823
T1444	-55.2438	-46.5575	-8.6863	22.1111
T0009	-55.2353	-55.0447	-0.1907	7.0862
T1787	-55.2211	-47.5382	-7.6829	7.2871
T4560	-55.2118	-42.3888	-12.823	6.4118
T6153	-55.2097	-55.0631	-0.1466	9.4323
T1640	-55.1941	-50.5277	-4.6664	12.1777
T7537	-55.1651	-55.3759	0.2108	21.5512
T7811	-55.1619	-44.0749	-11.0871	24.789
T2805	-55.1616	-56.3092	1.1476	6.9262
T5077	-55.16	-57.5063	2.3463	13.7445
T4573	-55.1587	-53.4721	-1.6867	10.228
T4986	-55.1364	-55.2466	0.1102	17.1538
T2565	-55.1361	-47.4838	-7.6522	8.5449
T5460	-55.1123	-53.0532	-2.0591	7.1243
T1078	-55.0712	-52.1869	-2.8843	5.3665
T1708	-55.0592	-54.7853	-0.2738	4.2316
T1483	-55.0557	-46.0736	-8.9821	8.7421
T4952	-55.0375	-51.6883	-3.3492	4.3209
T3067	-55.0318	-55.4574	0.4256	13.6196
T3416	-55.0151	-49.9996	-5.0155	7.1888
T1261	-55.008	-55.9321	0.924	13.25
T7853	-54.9943	-40.2209	-14.7733	0
T0394	-54.9548	-44.665	-10.2898	11.9891
T3824	-54.9495	-51.2243	-3.7252	10.3415
T2686L	-54.9467	-55.1823	0.2356	9.9718
T6566	-54.9431	-47.2355	-7.7076	8.8957
T2181	-54.9392	-50.8778	-4.0614	6.5123
T1175	-54.931	-51.0065	-3.9245	7.1987
T3366	-54.9277	-49.3849	-5.5428	14.6572
T0034	-54.898	-54.2289	-0.6692	25.5946
T2592	-54.8823	-49.8753	-5.007	4.6883
T1550	-54.88	-52.9407	-1.9393	4.7558
T1155	-54.8767	-54.7281	-0.1486	3.4606
T3033	-54.8684	-54.2039	-0.6644	3.4745
T0383	-54.8555	-46.7039	-8.1516	4.8846
T2S0157	-54.7955	-53.8609	-0.9345	8.9893
T0007	-54.7945	-45.1297	-9.6649	5.0241
T3096	-54.7917	-53.9036	-0.8881	12.2893
T0584L	-54.7781	-50.8272	-3.9509	6.0837
T0488	-54.7558	-54.1806	-0.5752	8.3046
T0895	-54.7489	-56.2481	1.4992	31.2182
T0263	-54.7264	-48.061	-6.6654	4.3232
T2O2668	-54.7065	-56.3812	1.6747	9.1652
T4006	-54.6996	-42.5738	-12.1257	3.8107
T6465	-54.6922	-55.2713	0.5792	11.7874
T3632	-54.6789	-56.2516	1.5727	10.8343
T6156	-54.6148	-54.4057	-0.2091	11.2466
T0797	-54.5994	-44.8001	-9.7992	4.467
T7363	-54.5923	-53.9443	-0.648	10.7851
T1400	-54.5918	-53.5578	-1.0339	36.0046
T1168	-54.5703	-52.9261	-1.6442	18.7597
T0584	-54.56	-50.2822	-4.2778	5.36
T2112	-54.545	-54.4026	-0.1424	8.6143
T0585	-54.5359	-49.6847	-4.8512	9.2265
T0996	-54.5189	-54.4397	-0.0793	7.6132
T0425L	-54.5037	-50.5872	-3.9165	10.3151
T0792	-54.4874	-36.3795	-18.1079	0
T0948L	-54.4868	-52.2528	-2.234	12.3097
T1284	-54.4723	-54.4292	-0.0431	14.5118
T2921	-54.469	-45.6571	-8.8119	72.0191
T0163	-54.4433	-55.3696	0.9262	14.1016
T1124	-54.4401	-52.4059	-2.0342	12.2056
T6580	-54.4256	-52.9027	-1.5229	9.5796
T3278	-54.415	-46.8766	-7.5384	6.4775
T8452	-54.4139	-50.994	-3.4199	3.6834
T4616	-54.3757	-49.4271	-4.9486	9.8011
T4276	-54.3234	-41.6604	-12.663	8.4696
T0487	-54.3228	-42.4006	-11.9222	7.0789
T2202	-54.3211	-56.6547	2.3335	11.3334
T4615	-54.3	-57.1939	2.8939	4.8139
T0860	-54.2789	-45.8777	-8.4012	11.8268
T2S1865	-54.2777	-54.2248	-0.0529	10.748
T6694	-54.2698	-54.6708	0.4011	3.7995
T4548	-54.2241	-45.0025	-9.2215	7.1047
T0847	-54.2118	-56.4544	2.2426	13.5545
T6089	-54.2084	-53.6296	-0.5789	9.3031
T3061	-54.2005	-53.4503	-0.7503	1.1394
T0199	-54.1939	-49.5285	-4.6654	7.3758
T1008	-54.1793	-47.8165	-6.3628	4.8277
T5720	-54.1768	-45.7962	-8.3806	6.2903
T1560	-54.1742	-53.585	-0.5892	15.6203
T1133	-54.1727	-48.8784	-5.2943	6.6689
T1156	-54.1686	-44.1262	-10.0424	7.2187
T7651	-54.1591	-62.1036	7.9445	0
T6503	-54.1298	-54.0215	-0.1083	23.9493
T0516	-54.1011	-57.0038	2.9028	9.6682
T0302	-54.0976	-46.8445	-7.2531	8.1297
T1471	-54.0888	-45.5265	-8.5623	7.0496
T0425	-54.071	-51.7992	-2.2718	10.3598
T0150	-54.0506	-55.5463	1.4958	7.8124
T0920	-54.0432	-42.5859	-11.4573	1.246
T1512	-54.0145	-46.2826	-7.7318	2.9498
T4567	-53.9924	-53.8857	-0.1067	5.818
T0344L	-53.9858	-53.6786	-0.3072	4.8186
T6630	-53.9844	-45.596	-8.3884	5.3755
T12408	-53.9807	-45.8466	-8.1341	15.1066
T1198	-53.9795	-43.8394	-10.1401	5.5376
T6S1256	-53.9668	-53.3653	-0.6014	4.2831
T1438	-53.9582	-53.3285	-0.6296	10.9911
T1069	-53.955	-49.8962	-4.0588	7.924
T0695	-53.9255	-51.5493	-2.3762	14.8965
T0450L	-53.9188	-44.2456	-9.6732	13.7741
T2O2798	-53.9158	-51.3464	-2.5694	5.0439
T1541	-53.9139	-54.47	0.5561	0
T1018	-53.9015	-49.9038	-3.9977	7.5318
T0182L2	-53.89	-43.5812	-10.3089	10.3087
T6234	-53.8807	-43.7421	-10.1386	1.9228
TJS2190	-53.839	-53.4947	-0.3443	12.4233
T0408	-53.8339	-54.6063	0.7724	8.6685
T7421	-53.8102	-46.1784	-7.6318	2.1891
T0717	-53.7991	-48.8859	-4.9132	7.8649
T0030	-53.7975	-48.1114	-5.6861	9.3424
T0674	-53.7969	-53.911	0.1141	5.9681
T3165	-53.7858	-51.7816	-2.0042	4.6573
T1628	-53.7606	-45.4714	-8.2892	9.5574
T0182L	-53.738	-48.0244	-5.7136	9.7011
T1141	-53.7271	-53.8792	0.1521	6.1032
T1134	-53.7247	-53.493	-0.2317	26.2298
T1583	-53.7196	-54.7769	1.0573	4.4841
T0133	-53.7013	-55.8748	2.1735	5.5942
T1466	-53.6977	-54.0838	0.3861	23.6011
T0697	-53.662	-46.7249	-6.9371	6.86
T2898	-53.6371	-50.7787	-2.8584	16.3772
T1498	-53.6177	-52.4228	-1.1949	8.4874
T5S0662	-53.6	-46.1245	-7.4756	4.0746
T4563	-53.5917	-43.4047	-10.187	13.1716
T4550	-53.5648	-45.4944	-8.0704	7.9823
T1517	-53.5565	-39.4793	-14.0771	2.116
T8386	-53.5491	-56.8351	3.2859	9.031
T0281	-53.5441	-52.2066	-1.3375	21.5099
T1167	-53.5162	-52.0556	-1.4606	14.6943
T1585	-53.5042	-52.3879	-1.1163	8.1263
T8406	-53.4673	-60.1525	6.6852	17.4276
T6S0232	-53.4465	-45.9647	-7.4818	7.2325
T1521	-53.4458	-49.9602	-3.4856	3.7224
T2529	-53.4385	-47.5443	-5.8943	6.0371
T6550	-53.4211	-52.4081	-1.013	7.3993
T3371	-53.414	-56.4306	3.0166	17.2984
T4499	-53.4101	-46.4356	-6.9744	8.41
T1306	-53.4019	-48.4778	-4.9242	9.4106
T0129	-53.3967	-46.337	-7.0597	0
T2270	-53.3859	-53.3178	-0.0681	7.3569
T2686	-53.3711	-56.8158	3.4447	9.3924
T0212	-53.3339	-54.2665	0.9325	15.9156
T1401	-53.3319	-44.5188	-8.813	3.018
T0444L	-53.3226	-52.9626	-0.36	8.9835
T2174	-53.3158	-44.8107	-8.5051	3.381
T0073	-53.3118	-53.0399	-0.2719	8.6766
T6443	-53.2888	-42.4213	-10.8675	8.4674
T0917	-53.2715	-54.3768	1.1053	3.4138
T0122	-53.2676	-48.8361	-4.4314	5.0062
T0853L	-53.2645	-52.1309	-1.1336	6.5382
T0287	-53.2642	-41.3272	-11.9371	6.3553
T2764	-53.2564	-50.963	-2.2934	3.7714
T0957	-53.2409	-51.524	-1.717	11.2286
T2717	-53.2272	-48.4792	-4.7481	5.6034
T4966	-53.2255	-51.9764	-1.2492	4.6521
T8395	-53.2199	-53.6638	0.444	15.4905
T6567	-53.2112	-46.4358	-6.7755	5.8178
T8130	-53.2073	-46.0809	-7.1264	4.1993
T1021	-53.1607	-53.619	0.4583	5.1109
T1399	-53.1603	-51.0294	-2.1309	11.8483
T5174	-53.1532	-51.408	-1.7452	46.4053
T6501	-53.0905	-50.3519	-2.7387	5.1385
T3276	-53.0724	-52.2279	-0.8445	5.0038
T0018	-53.0709	-42.2157	-10.8552	2.6545
T1451	-53.0646	-47.7839	-5.2807	5.2583
T0454L	-53.0615	-51.1747	-1.8868	5.1227
T4054	-53.0473	-53.2914	0.2441	5.2399
T0225	-53.0473	-44.2984	-8.7488	5.4188
T0396	-53.0388	-47.4993	-5.5396	3.7911
T0229	-53.0237	-44.5497	-8.474	10.365
T1538	-53.0118	-43.083	-9.9288	9.8889
T2569	-52.9696	-51.2666	-1.703	6.5767
T0077	-52.9011	-53.1219	0.2208	5.5731
T0586	-52.8879	-48.3837	-4.5042	4.5259
T1829	-52.8845	-52.7587	-0.1259	7.896
T0444	-52.8815	-52.6033	-0.2781	12.9045
T4382	-52.8688	-39.816	-13.0528	4.8453
T1704	-52.8399	-46.2616	-6.5782	4.514
T3060	-52.8306	-40.7879	-12.0427	7.6804
T1030	-52.8164	-46.0396	-6.7769	5.1599
T1330	-52.8	-51.825	-0.975	10.9596
T0409	-52.7927	-54.727	1.9343	5.1936
T2886	-52.7657	-52.9294	0.1636	15.6549
T1577	-52.7433	-40.1363	-12.607	7.0132
T2803	-52.7044	-45.5751	-7.1293	61.6776
T5013	-52.7019	-52.2375	-0.4644	7.9217
T0255	-52.682	-46.8546	-5.8274	6.6181
T1317	-52.6723	-46.509	-6.1633	15.2499
T6686	-52.6578	-52.2968	-0.3611	5.797
T0074L	-52.6412	-44.3552	-8.286	9.8098
T2880	-52.6344	-48.1524	-4.482	3.9401
T2690	-52.6308	-54.2371	1.6063	5.8079
T4733	-52.6229	-46.599	-6.0239	10.7009
T2828	-52.6062	-53.4905	0.8844	12.9604
T1543	-52.6034	-48.8298	-3.7736	3.2828
T0802	-52.5889	-40.5219	-12.067	6.422
T0250	-52.5393	-49.8142	-2.7251	7.5388
T4S0797	-52.5358	-45.014	-7.5218	2.9003
T8364	-52.4985	-46.8477	-5.6508	8.0089
T0850	-52.4909	-41.3575	-11.1334	4.3435
T1384	-52.4908	-45.5599	-6.9309	11.5734
T3428	-52.4856	-49.8056	-2.68	4.7478
T0466	-52.485	-52.6034	0.1184	5.1539
T5017	-52.4755	-52.617	0.1415	10.6693
T0074	-52.4572	-45.4595	-6.9977	3.9285
T0748	-52.456	-50.9789	-1.4771	4.3057
T7940	-52.4506	-42.5499	-9.9007	13.4267
T2149	-52.4476	-42.192	-10.2556	5.3125
T0205	-52.4118	-43.4935	-8.9183	15.1067
T3500	-52.3837	-53.0986	0.7149	6.4935
T0828	-52.3706	-43.9156	-8.455	7.4482
T6504	-52.3694	-52.8683	0.4989	6.2486
T0084	-52.3646	-45.5614	-6.8032	3.1432
T0450	-52.3628	-45.2629	-7.0998	5.7729
T4274	-52.3596	-46.8505	-5.5091	4.9773
T0461	-52.354	-44.6249	-7.7292	5.9255
T0070	-52.3241	-52.2771	-0.047	5.5773
T2179	-52.3164	-51.5148	-0.8016	4.3577
T2551	-52.3076	-52.0479	-0.2597	10.2092
T5S1058	-52.2975	-49.2511	-3.0464	3.7324
T0119	-52.2466	-51.4953	-0.7513	12.4185
T7085	-52.2396	-42.4316	-9.8081	3.9072
T3141	-52.2274	-52.1053	-0.1221	4.3928
T1599L	-52.1907	-51.3225	-0.8681	6.5352
T6S0525	-52.175	-51.5409	-0.6341	11.1791
T1052	-52.1602	-53.2715	1.1114	17.0965
T1045	-52.1272	-42.4133	-9.7139	9.969
T3316	-52.112	-51.3907	-0.7213	10.7353
T0026	-52.1047	-51.0906	-1.0141	5.9521
T1574	-52.1032	-50.6618	-1.4415	5.6479
T2P2923	-52.0941	-53.2536	1.1595	14.5558
T7807	-52.0515	-51.871	-0.1805	3.7976
T6708	-52.0483	-51.4825	-0.5657	5.7529
T1442	-52.0469	-43.4299	-8.617	4.4437
T6618	-52.0391	-43.1524	-8.8866	10.1277
T1259	-52.0386	-55.9951	3.9565	14.0318
T0980	-52.0294	-50.7344	-1.295	6.1041
T1505	-52.0234	-46.9503	-5.0731	8.1521
T3232	-51.9843	-42.8204	-9.1639	6.3509
T2046	-51.9762	-41.515	-10.4612	1.9774
T2222	-51.962	-42.7892	-9.1729	5.9554
T0059	-51.9313	-44.5212	-7.4101	6.9167
T1335	-51.8985	-53.1999	1.3014	15.6813
T2745	-51.8618	-52.876	1.0143	7.0659
T1232	-51.8519	-45.3343	-6.5177	5.8094
T0095	-51.8207	-58.4154	6.5947	9.4089
T1526	-51.8181	-46.9452	-4.8729	2.8618
T0824	-51.8039	-51.3309	-0.4731	4.6971
T0029	-51.8029	-39.6249	-12.178	6.3364
T0844	-51.7988	-50.3562	-1.4427	2.9538
T6645	-51.7902	-44.2286	-7.5615	8.0825
T0174	-51.773	-42.9292	-8.8438	5.1223
T6381	-51.7702	-28.1186	-23.6516	4.917
T3115	-51.7587	-51.1117	-0.6469	6.5248
T6539	-51.7469	-51.2636	-0.4833	8.2589
T6814	-51.7328	-42.9902	-8.7426	5.1072
T1580	-51.7214	-40.4061	-11.3153	9.3591
T0386	-51.7211	-43.2828	-8.4383	9.9109
T2750	-51.6854	-49.9725	-1.7129	28.3227
T6212	-51.6636	-47.2691	-4.3945	8.5768
T0716	-51.6605	-47.6501	-4.0104	4.0651
T5040	-51.6555	-50.9837	-0.6718	7.9613
T3384	-51.6464	-50.5772	-1.0692	2.4765
T0714	-51.632	-51.9365	0.3045	2.8058
T4982	-51.6155	-48.316	-3.2995	4.8013
T0286	-51.591	-43.7568	-7.8342	5.2647
T1655	-51.5847	-57.025	5.4403	22.121
T1085	-51.584	-47.6942	-3.8898	5.3032
T6652	-51.5738	-41.599	-9.9748	5.4223
T2835	-51.5603	-44.094	-7.4663	6.6638
T1307	-51.5485	-51.4957	-0.0528	10.8121
T6875	-51.5427	-51.9933	0.4505	14.2726
T0108	-51.5288	-50.698	-0.8308	14.6643
T0345	-51.5274	-50.5021	-1.0253	5.6621
T1684	-51.5146	-46.4636	-5.051	17.9913
T2575	-51.5044	-30.8459	-20.6585	3.0156
T0113	-51.5032	-42.76	-8.7431	3.5549
T4545	-51.4791	-45.5054	-5.9737	6.5756
T3282	-51.4593	-42.9478	-8.5115	13.4846
T0699	-51.4589	-50.2803	-1.1786	3.7246
T1491	-51.3925	-52.9145	1.5219	21.2476
T6523	-51.3735	-50.1157	-1.2578	1.9464
T1674	-51.3623	-50.9574	-0.4049	17.5836
T6624	-51.3613	-49.3742	-1.9871	41.578
T0146	-51.3575	-50.933	-0.4245	6.4189
T1435	-51.344	-51.0162	-0.3278	13.4786
T1146	-51.342	-47.8428	-3.4992	12.3556
T4682	-51.3294	-50.015	-1.3144	5.2026
T2731	-51.3204	-49.3035	-2.0168	10.8726
T1117	-51.3184	-39.627	-11.6914	1.577
T1540	-51.3024	-43.1335	-8.1689	5.1647
T4439	-51.2811	-41.8085	-9.4726	7.1341
T6835	-51.2669	-39.5274	-11.7396	3.5031
T0913	-51.2529	-50.2901	-0.9628	3.6126
T0812	-51.2444	-46.4031	-4.8413	5.4052
T8696	-51.2444	-46.4031	-4.8413	5.4052
T0172	-51.1948	-43.1269	-8.0679	6.3246
T0837	-51.1664	-51.8636	0.6973	7.4282
T5S0814	-51.1593	-42.9589	-8.2004	3.4823
T6253	-51.1215	-51.8605	0.739	4.8074
T0386L	-51.1036	-45.5531	-5.5505	8.8475
T3684	-51.1005	-50.4448	-0.6556	6.3069
T3043	-51.0882	-51.115	0.0268	8.0558
T6485	-51.0631	-52.3664	1.3034	9.6439
T1274	-51.0591	-49.9051	-1.154	2.6085
T2395	-51.0348	-42.39	-8.6447	2.8172
T0511	-51.0292	-43.6826	-7.3466	7.4364
T7164	-51.0201	-43.4395	-7.5805	7.6958
T0921	-51.0095	-51.1513	0.1418	7.8827
T3614	-51.0027	-50.1777	-0.8251	3.5849
T3272	-50.9724	-50.8326	-0.1398	9.441
T0201	-50.9697	-43.4508	-7.519	16.4215
T6603	-50.9618	-50.1622	-0.7997	8.0869
T1308	-50.9323	-44.8365	-6.0959	6.6797
T1144	-50.9177	-40.0037	-10.9139	7.2158
T0309	-50.9091	-50.7926	-0.1165	9.0227
T1527	-50.889	-52.5588	1.6698	3.3511
T6561	-50.8726	-48.77	-2.1027	12.2816
T0423	-50.8635	-51.9666	1.1031	6.7785
T2738	-50.8489	-48.6532	-2.1957	15.7278
T1191	-50.8488	-50.5658	-0.283	11.1198
T1191L	-50.837	-47.9499	-2.887	9.8129
T1027	-50.83	-44.2137	-6.6164	5.6651
T0086	-50.8298	-41.8141	-9.0157	0.6851
T7941	-50.8099	-41.3548	-9.4551	6.2087
T6188	-50.8091	-38.9265	-11.8826	11.3337
T1189	-50.8082	-40.5717	-10.2364	18.1393
T1852	-50.7814	-51.2015	0.4201	8.9009
T0468	-50.7785	-38.6112	-12.1673	7.0934
T1144L	-50.7676	-40.0815	-10.6861	7.5713
T1237	-50.7535	-49.6661	-1.0875	4.0753
T1126	-50.7535	-54.1062	3.3527	6.3598
T0114	-50.7443	-49.8751	-0.8692	4.3059
T0053	-50.73	-54.4354	3.7054	18.5737
T1432	-50.7075	-50.3093	-0.3982	5.8553
T1620	-50.6636	-46.9755	-3.6882	8.1088
T1115	-50.6444	-44.5136	-6.1308	7.9616
T0354	-50.6405	-50.9909	0.3504	0
T0711	-50.6164	-47.1867	-3.4297	2.438
T8069	-50.5912	-50.1752	-0.416	9.4394
T2908	-50.5263	-50.1017	-0.4246	9.9842
T0452	-50.4909	-41.1909	-9.3	5.1466
T1709	-50.4756	-50.1262	-0.3494	3.3064
T1152	-50.4305	-49.7955	-0.6351	6.9637
T0012	-50.4196	-47.5911	-2.8285	13.5284
T6587	-50.4092	-50.9503	0.5411	13.7499
T2398	-50.3404	-49.3331	-1.0073	11.0451
T3017	-50.3358	-50.7562	0.4204	3.6428
T8066	-50.3271	-52.0787	1.7516	10.9153
T5S2017	-50.3184	-49.3783	-0.9401	7.6344
T1205	-50.3095	-43.9198	-6.3896	5.3862
T4S1725	-50.2845	-41.9809	-8.3035	1.7812
T1530	-50.2642	-52.9923	2.7281	14.0629
T0894	-50.255	-42.5243	-7.7307	8.0605
T0977	-50.239	-49.6705	-0.5686	10.0199
T0869	-50.2387	-44.8807	-5.358	10.493
T5602	-50.1904	-51.6713	1.4809	9.3842
T2520	-50.1821	-40.481	-9.7011	6.7109
T7477	-50.1758	-42.9113	-7.2645	12.8734
T1139	-50.1606	-40.2319	-9.9287	7.9196
T1421	-50.1279	-53.0421	2.9142	7.6418
T0204	-50.1217	-42.1499	-7.9718	5.4336
T0445L	-50.0436	-40.5537	-9.4899	11.0174
T2999	-50.0373	-47.9859	-2.0513	6.9031
T2403	-50.0266	-51.7216	1.695	7.2285
T0458	-50.0213	-48.8607	-1.1606	17.1526
T0219	-50.0123	-48.8468	-1.1656	4.4651
T0092	-49.9953	-42.509	-7.4863	8.6285
T2405	-49.9662	-48.9243	-1.0418	6.8209
T6321	-49.9551	-49.8629	-0.0922	15.9062
T2559	-49.9311	-49.3963	-0.5349	8.0255
T6424	-49.9179	-51.6436	1.7257	6.9521
T0236	-49.9061	-39.6963	-10.2098	5.5854
T6606	-49.9005	-48.1718	-1.7287	1.7064
T0773	-49.8815	-52.645	2.7635	4.2028
T0217	-49.876	-41.2608	-8.6152	2.6963
T1611	-49.8726	-48.5438	-1.3288	10.0467
T6953	-49.87	-39.3973	-10.4726	3.142
T0693	-49.8292	-51.0187	1.1895	4.7379
T0722	-49.8286	-48.5928	-1.2358	16.6443
T1281	-49.8218	-48.3862	-1.4356	12.1193
T0816	-49.8195	-51.3238	1.5042	7.6835
T3383	-49.8006	-45.6735	-4.127	8.0838
T0725	-49.7985	-47.7808	-2.0177	2.1665
T0478	-49.7935	-49.5089	-0.2846	4.3675
T0766	-49.7921	-40.769	-9.0231	9.4375
T1051	-49.7762	-51.6454	1.8692	9.7072
T0482	-49.7637	-41.5649	-8.1988	5.1631
T1497	-49.7606	-49.4748	-0.2858	9.4206
T2395L	-49.7577	-42.7507	-7.007	4.215
T4983	-49.7497	-36.8124	-12.9372	5.3237
T3002	-49.7413	-49.1398	-0.6015	10.4336
T1429	-49.7363	-48.7545	-0.9818	10.2846
T6410	-49.7352	-52.545	2.8098	3.109
T0822	-49.7224	-41.3791	-8.3433	1.7248
T0955	-49.7181	-48.7239	-0.9942	5.0582
T1327	-49.7148	-40.1566	-9.5582	6.2427
T1604	-49.714	-48.5258	-1.1883	10.8496
T0785	-49.6979	-41.0542	-8.6437	13.1036
T2177	-49.6927	-43.2988	-6.3939	3.4919
T0503	-49.6879	-34.0335	-15.6543	6.0397
T4562	-49.6843	-48.9806	-0.7037	2.8951
T6359	-49.6556	-49.4795	-0.1761	8.3065
T6216	-49.6489	-49.2535	-0.3955	14.8603
T0017	-49.6457	-46.9015	-2.7443	10.3986
T0678	-49.6445	-43.664	-5.9805	5.0949
T0016	-49.6415	-48.7879	-0.8536	3.7397
T0145	-49.6391	-49.2071	-0.432	12.8259
T2594	-49.6218	-38.6069	-11.0149	14.596
T1280	-49.6108	-49.5029	-0.1079	6.602
T3285	-49.6059	-47.877	-1.7289	10.0706
T1553	-49.5324	-41.4117	-8.1207	12.2816
T1478	-49.5245	-48.5515	-0.973	5.613
T0691	-49.5149	-51.2339	1.719	8.3042
T0946	-49.5116	-44.9201	-4.5915	8.0591
T6644	-49.4711	-48.7649	-0.7062	7.4236
T1123	-49.4661	-49.0044	-0.4617	3.6586
T1063	-49.4416	-54.7493	5.3077	6.6951
T4412	-49.4372	-51.069	1.6318	7.5188
T0856	-49.419	-48.0702	-1.3488	4.2398
T5325	-49.414	-48.404	-1.01	1.5737
T5328	-49.3927	-50.6547	1.262	34.7973
T1480	-49.3651	-48.6637	-0.7014	3.5616
T0437	-49.3567	-48.0526	-1.3041	2.0162
T1536	-49.3559	-48.2659	-1.09	4.099
T1273	-49.3559	-49.9831	0.6273	13.3511
T0991	-49.3476	-41.13	-8.2176	7.9567
T0851	-49.3436	-48.1094	-1.2342	3.6589
T2792	-49.3282	-31.5868	-17.7414	5.6781
T1463	-49.326	-47.819	-1.507	6.8016
T2946	-49.2998	-48.8225	-0.4773	1.0297
T0445	-49.2843	-42.264	-7.0203	12.9364
T2752	-49.2777	-48.7909	-0.4867	3.3397
T0393	-49.2666	-48.6193	-0.6473	9.1771
T6615	-49.2615	-48.2503	-1.0113	6.7515
T3941	-49.2344	-51.1477	1.9133	9.9338
T1183	-49.2115	-48.5924	-0.6191	9.2325
T0459	-49.1925	-49.0524	-0.1401	17.2635
T0006	-49.1895	-42.6382	-6.5513	6.7397
T6367	-49.177	-48.7954	-0.3816	29.3162
T2801	-49.0938	-50.7981	1.7042	7.8509
T8123	-49.0726	-46.7669	-2.3057	9.4824
T4273	-49.0544	-46.2016	-2.8528	3.5208
T0796	-48.9974	-37.8751	-11.1224	4.0442
T1187	-48.9912	-48.7724	-0.2187	8.5002
T0120	-48.9767	-48.6636	-0.3131	26.3513
T6964	-48.9752	-47.1619	-1.8133	13.3552
T1054	-48.9565	-49.2707	0.3141	3.8166
T1584	-48.9565	-38.8362	-10.1203	4.7409
T8133	-48.9316	-50.6669	1.7353	8.1186
T1267	-48.9225	-48.4852	-0.4373	8.7734
T1649	-48.8963	-49.3439	0.4476	3.5894
T1382	-48.8628	-49.4728	0.61	6.0964
T0330	-48.8515	-40.818	-8.0335	7.5592
T3339	-48.8336	-37.6006	-11.233	0
T2184	-48.825	-48.2286	-0.5964	3.4324
T0298	-48.789	-39.4266	-9.3624	4.259
T2525	-48.7648	-48.0332	-0.7316	3.1179
T2858	-48.764	-42.3301	-6.4339	2.3411
T0698	-48.7062	-47.1551	-1.5511	3.6873
T0272	-48.6903	-45.7803	-2.91	10.4861
T4985	-48.6518	-48.0099	-0.6419	5.8583
T2220	-48.6474	-46.4046	-2.2428	1.3936
T3020	-48.6243	-47.0626	-1.5617	12.4817
T2856	-48.6151	-40.9903	-7.6248	5.0512
T1632	-48.6138	-48.4718	-0.142	4.4173
T1402	-48.5876	-49.7074	1.1198	18.3117
T1153	-48.5828	-44.9823	-3.6004	30.6257
T12478	-48.5804	-35.9091	-12.6713	8.0535
T2848	-48.5611	-47.8395	-0.7216	8.6247
T0504	-48.56	-48.1564	-0.4036	7.3608
T4271	-48.5596	-47.2117	-1.3479	3.618
T1509	-48.5588	-43.1599	-5.3989	4.6083
T3495	-48.558	-47.6697	-0.8883	5.4067
T3S0738	-48.5374	-45.9286	-2.6088	3.5005
T0858	-48.5234	-49.115	0.5916	5.057
T1185	-48.5161	-46.2031	-2.313	5.6853
T0675	-48.5057	-47.1187	-1.387	4.2821
T1643	-48.4551	-49.1987	0.7436	4.3342
T6649	-48.3525	-47.7266	-0.6259	9.1368
T1416	-48.3254	-47.373	-0.9523	4.079
T6470	-48.3112	-49.0536	0.7424	17.6014
T5264	-48.3101	-46.359	-1.9512	0.0549
T6623	-48.3044	-47.4846	-0.8198	5.3255
T1220	-48.302	-40.9607	-7.3413	10.3875
T2567	-48.2964	-46.6514	-1.6449	12.6634
T6574	-48.2828	-47.1639	-1.1189	13.8339
T3S2100	-48.2815	-38.0306	-10.2509	0
T0443	-48.2783	-46.4548	-1.8235	4.5989
T1392	-48.276	-47.3997	-0.8764	0.057
T0872L	-48.2667	-40.8752	-7.3915	7.4949
T1720	-48.2575	-49.6084	1.3509	7.2129
T1477	-48.2382	-46.9768	-1.2614	2.9786
T5186	-48.1882	-42.1481	-6.0401	9.5873
T7223	-48.1862	-48.1672	-0.019	11.0274
T0958	-48.1823	-51.2959	3.1136	4.7661
T1453	-48.166	-33.4686	-14.6974	3.5533
T0688	-48.1563	-47.2139	-0.9424	6.7968
T4542	-48.1272	-49.395	1.2678	4.2107
T0863	-48.1213	-44.1457	-3.9756	12.1093
T1188	-48.1068	-46.7981	-1.3087	2.5828
T1333	-48.0708	-49.3313	1.2605	5.2961
T6888	-48.0616	-41.9478	-6.1138	6.9428
T1150	-48.057	-37.6169	-10.4401	5.7707
T1303	-48.0567	-47.7525	-0.3042	17.4813
T0362	-48.0134	-47.0635	-0.9499	3.8112
T0137	-48.008	-38.3317	-9.6763	0
T0975	-47.9978	-49.4144	1.4166	12.4772
T5584	-47.9879	-48.6071	0.6192	15.7824
T0724	-47.9863	-47.8166	-0.1697	2.5536
T0297	-47.9824	-46.8355	-1.1469	4.6618
T2279	-47.9496	-44.1891	-3.7605	2.6142
T1038	-47.9398	-47.3383	-0.6015	6.7115
T1473	-47.9144	-47.1003	-0.814	0.9067
T1951	-47.8884	-41.7693	-6.1191	0
T2577	-47.8833	-46.8115	-1.0718	5.6291
T1440	-47.8765	-37.9199	-9.9565	2.5683
T2196	-47.8646	-46.2384	-1.6262	5.6474
T0870	-47.86	-46.8171	-1.0429	5.255
T0989	-47.8472	-38.0801	-9.7671	6.2754
T0993	-47.8433	-37.6094	-10.2339	8.2059
T0265	-47.8401	-54.2581	6.418	13.3413
T2199	-47.8329	-46.9377	-0.8952	9.536
T0741	-47.7935	-48.1054	0.3119	3.1203
T0301	-47.7903	-46.3197	-1.4706	2.771
T5832	-47.7707	-49.7761	2.0054	8.2001
T2411	-47.7661	-47.0007	-0.7654	14.6659
T2845	-47.7479	-46.3853	-1.3626	3.1793
T1143	-47.72	-52.3334	4.6134	12.9828
T1263	-47.703	-47.4847	-0.2183	12.8143
T0853	-47.6964	-46.6307	-1.0658	2.3851
T0370	-47.6484	-39.7682	-7.8802	11.4481
T0770	-47.6097	-47.0781	-0.5316	2.0999
T0184	-47.6061	-48.3878	0.7817	8.4447
T7969	-47.5738	-45.961	-1.6128	6.4503
T1409	-47.5199	-46.8748	-0.6451	6.7738
T0432	-47.4971	-46.8848	-0.6123	13.4576
T0930	-47.4873	-46.5652	-0.9221	3.6667
T2843	-47.4657	-46.5346	-0.9312	12.3751
T0054	-47.4446	-47.3738	-0.0708	7.9937
T0750	-47.4373	-48.1959	0.7586	4.7976
T4553	-47.4151	-49.4428	2.0277	5.0174
T1388	-47.3973	-47.2689	-0.1284	12.8499
T1468	-47.3771	-48.1415	0.7644	14.3765
T6214	-47.3745	-46.5246	-0.8499	8.62
T1544	-47.3593	-45.009	-2.3503	5.4113
T4269	-47.3567	-49.2256	1.8689	17.2668
T0708	-47.3535	-49.6266	2.2731	4.6645
T6616	-47.3493	-46.7576	-0.5917	6.2154
T7066	-47.332	-49.9073	2.5753	12.098
T2175	-47.3145	-44.3505	-2.964	2.7363
T3289	-47.3076	-31.4224	-15.8851	1.6733
T0594	-47.2986	-40.4205	-6.8781	6.8087
T1458	-47.2464	-47.0069	-0.2395	8.8176
T1313	-47.244	-42.3515	-4.8925	3.2141
T4561	-47.2227	-48.6146	1.3918	6.2441
T4718	-47.2202	-48.3854	1.1652	7.883
T5967	-47.208	-40.2262	-6.9818	1.2168
T4559	-47.2069	-46.7466	-0.4603	7.2105
T2550	-47.1665	-48.2915	1.125	9.6113
T3288	-47.162	-47.2363	0.0743	2.8118
T0262	-47.1488	-38.5517	-8.5971	1.9368
T0767	-47.1437	-46.2844	-0.8593	3.2173
T1137	-47.1386	-45.4611	-1.6774	9.6154
T0893	-47.1304	-45.4883	-1.6421	5.6683
T1269	-47.1153	-38.5231	-8.5922	6.3845
T1507	-47.1083	-44.4015	-2.7068	4.896
T1579	-47.1032	-46.7337	-0.3695	4.5302
T7004	-47.0747	-46.2343	-0.8403	5.4235
T1659	-47.0608	-46.9654	-0.0953	5.2163
T0815L	-47.0141	-44.0408	-2.9734	17.6517
T0670	-46.9638	-31.8561	-15.1077	5.3706
T0891	-46.9121	-46.4093	-0.5028	4.0939
T6497	-46.9014	-47.8	0.8987	4.3034
T1094	-46.8518	-46.8812	0.0295	47.1104
T2869	-46.8485	-45.9216	-0.9269	11.2561
T0085L	-46.841	-44.6042	-2.2368	4.323
T0360	-46.8338	-47.1889	0.3551	6.6644
T4549	-46.8318	-45.8483	-0.9835	3.0769
T0839	-46.8163	-47.878	1.0617	5.0134
T0042	-46.8112	-39.6115	-7.1997	12.7246
T1506	-46.8027	-45.5052	-1.2975	6.3216
T0175	-46.7996	-35.6499	-11.1496	1.996
T1612	-46.7785	-40.5535	-6.225	10.719
T6422	-46.777	-39.4759	-7.3011	2.2713
T0809	-46.7215	-45.3158	-1.4057	10.8229
T0490	-46.7163	-47.3406	0.6243	3.5071
T0027	-46.6987	-46.1248	-0.5738	11.3889
T6819	-46.6616	-45.8493	-0.8123	11.1863
T0085	-46.6543	-43.3976	-3.2567	3.6425
T3026	-46.6232	-36.5249	-10.0983	3.6559
T6372	-46.6175	-46.14	-0.4774	9.742
T1490	-46.6174	-46.7611	0.1437	12.4612
T6951	-46.5832	-37.0287	-9.5545	2.5135
T1428	-46.5724	-45.7284	-0.844	10.6465
T0892	-46.5628	-45.8217	-0.7411	5.1215
T0859	-46.559	-46.4462	-0.1129	6.2878
T1737	-46.555	-42.8159	-3.7392	3.7917
T2530	-46.5501	-46.6978	0.1477	4.1272
T1240	-46.5399	-45.2461	-1.2938	4.1703
T1586	-46.5364	-47.0899	0.5535	6.4109
T0839L	-46.5163	-47.7112	1.1949	3.5458
T4570	-46.4918	-46.0639	-0.4278	9.98
T0480	-46.4678	-46.3232	-0.1446	2.7405
T0499	-46.4649	-45.5874	-0.8774	3.2577
T0754	-46.4412	-45.8984	-0.5428	3.3197
T2558	-46.4391	-44.9656	-1.4735	2.3998
T0948	-46.4327	-34.5993	-11.8334	0.3407
T3369	-46.428	-40.5691	-5.8589	18.3742
T0677	-46.4082	-45.9182	-0.49	3.5902
T0718	-46.3909	-46.0087	-0.3822	5.2775
T3003	-46.3834	-44.0957	-2.2877	5.305
T2597	-46.3809	-46.4474	0.0666	12.7448
T1639	-46.3597	-47.2177	0.8579	4.4135
T8135	-46.3465	-45.4906	-0.8559	7.18
T2570	-46.3238	-46.1706	-0.1532	5.065
T0277	-46.3224	-34.7719	-11.5505	4.9285
T0109	-46.3205	-42.8857	-3.4348	4.1969
T1590	-46.3101	-46.628	0.3179	6.0318
T1882	-46.2833	-46.1529	-0.1303	72.9441
T2195	-46.2777	-46.0873	-0.1903	0.0594
T2150	-46.207	-37.0878	-9.1192	4.7921
T4504	-46.2055	-45.8042	-0.4013	1.8828
T1445	-46.196	-45.98	-0.2159	4.1832
T1415	-46.1862	-46.8857	0.6996	9.4832
T3S2019	-46.1385	-46.1401	0.0016	18.7976
T1403	-46.1083	-45.4957	-0.6126	10.2523
T1071L	-46.1038	-32.6128	-13.4911	1.2524
T4374	-46.0993	-45.3141	-0.7852	6.2986
T0751	-46.0872	-41.5958	-4.4914	1.6673
T6375	-46.0828	-42.1964	-3.8864	3.3301
T0506	-46.0825	-45.7322	-0.3503	27.0705
T3S0364	-46.0786	-33.0652	-13.0134	3.8489
T1624	-46.0763	-40.0475	-6.0288	8.8873
T7117	-46.0551	-44.8651	-1.19	5.8789
T1529	-46.0415	-33.7002	-12.3413	4.0438
T0783	-46.0249	-39.424	-6.6008	0
T1686	-46.0129	-41.2625	-4.7504	1.5538
T0747	-46.0101	-45.5292	-0.481	3.1744
T3279	-45.9937	-46.852	0.8583	3.326
T1099	-45.9776	-43.2357	-2.7419	0.7956
T1514	-45.9531	-44.8015	-1.1516	2.9668
T0784	-45.9185	-47.2699	1.3514	4.7519
T0856L	-45.9127	-45.1111	-0.8016	0.0362
T3658	-45.8405	-41.6637	-4.1769	8.137
T0684	-45.8289	-44.6203	-1.2086	1.6672
T1454	-45.8109	-44.5125	-1.2984	1.5175
T4911	-45.7995	-41.3129	-4.4866	4.3265
T1488	-45.7946	-45.963	0.1684	2.8838
T0175L	-45.7803	-41.4901	-4.2902	1.9046
T7974	-45.775	-44.999	-0.776	3.3186
T8145	-45.7038	-45.7885	0.0847	7.0069
T6992	-45.6758	-46.3026	0.6267	4.9515
T0826	-45.6522	-47.5911	1.939	3.8925
T2384	-45.6278	-45.5868	-0.0411	8.3532
T4564	-45.6195	-45.7751	0.1556	6.4332
T0075	-45.5951	-44.7079	-0.8872	14.2431
T1476	-45.5849	-36.4071	-9.1779	1.0955
T0429	-45.5576	-31.157	-14.4007	0.8532
T5012	-45.5415	-45.4643	-0.0772	3.5615
T7583	-45.5333	-34.7851	-10.7482	7.8873
T1638	-45.5225	-45.7117	0.1891	7.5402
T2941	-45.5034	-33.9869	-11.5165	0.7927
T1233	-45.4754	-46.1009	0.6255	11.4278
T0463	-45.4699	-46.0907	0.6208	4.707
T2995	-45.4652	-44.71	-0.7552	10.819
T2578	-45.4411	-45.376	-0.065	3.1522
T2O2733	-45.4353	-41.7608	-3.6744	3.6298
T1339	-45.4288	-44.3661	-1.0627	4.0875
T1946	-45.4047	-45.3692	-0.0355	9.2472
T2868	-45.4044	-45.3655	-0.0388	0
T1212	-45.3769	-44.6723	-0.7046	2.8297
T1571	-45.3766	-42.8057	-2.5709	0.76
T0838	-45.3573	-44.8815	-0.4758	3.4631
T0470	-45.2921	-36.7795	-8.5126	1.69
T0610	-45.2686	-39.3806	-5.888	1.1595
T3001	-45.2453	-44.7184	-0.5269	4.8134
[truncated: 849 more rows]
